# Supplementary material
Source: PubMed Central journal article supplement (PMC4390639)
Supplement: JCM.03527-14_zjm999094109so1.pdf [file JCM.03527-14_zjm999094109so1.pdf]

**Supplementary Table 1: GenBank Accession details for genomes analyzed**

| Genome            | Accession #     | Used in comparison<br>(n=69) | Short reads used<br>for in silico screen |
|-------------------|-----------------|------------------------------|------------------------------------------|
| E. coli 101_1     | AAMK00000000    |                              |                                          |
| E. coli 1_2264    | AEZO00000000    |                              |                                          |
| E. coli 1_2741    | AEZI00000000    | X                            |                                          |
| E. coli 1827_70   | ADUK00000000    | X                            |                                          |
| E. coli 2_3916    | AFAB00000000    | X                            |                                          |
| E. coli 2_4168    | AFAD00000000    | X                            |                                          |
| E. coli 2534_86   | AFDS00000000    | X                            |                                          |
| E. coli 3003      | AFAF00000000    |                              |                                          |
| E. coli 3030_1    | AFDT00000000    |                              |                                          |
| E. coli 3_2303    | AFAE00000000    | X                            |                                          |
| E. coli 3_2608    | AEZS00000000    | X                            |                                          |
| E. coli 3_3884    | AFAC00000000    | X                            |                                          |
| E. coli 3431      | ADUM00000000    |                              |                                          |
| E. coli 4_0522    | AEZU00000000    | X                            |                                          |
| E. coli 4_0967    | AFAA00000000    | X                            |                                          |
| E. coli 4_1_47FAA | ACTQ00000000    | X                            |                                          |
| E. coli 5_0588    | AEZK00000000    |                              |                                          |
| E. coli 5_0959    | AEZX00000000    | X                            |                                          |
| E. coli 53638     | NZ_AAKB00000000 |                              |                                          |
| E. coli 536       | NC_008253.1     |                              |                                          |
| E. coli 541_15    | AJWQ00000000    | X                            |                                          |
| E. coli 541_1     | AJWR00000000    |                              |                                          |
| E. coli 55989     | NC_011748.1     |                              |                                          |
| E. coli 576_1     | AJWS00000000    |                              |                                          |
| E. coli 75        | AJWT00000000    |                              |                                          |
| E. coli 83972     | ACGN00000000    |                              |                                          |
| E. coli 900105    | AFAI00000000    | X                            |                                          |
| E. coli 9_1649    | AEZY00000000    | X                            |                                          |
| E. coli 93_001    | AKLB00000000    | X                            |                                          |
| E. coli 93_0624   | AEZT00000000    |                              |                                          |
| E. coli 95_0941   | AEZN00000000    | X                            |                                          |
| E. coli 96_0497   | AEZQ00000000    |                              |                                          |
| E. coli 96_154    | AEZW00000000    | X                            |                                          |
| E. coli 97_0246   | AEZJ00000000    |                              |                                          |
| E. coli 97_0259   | AEZL00000000    |                              |                                          |
| E. coli 97_0264   | AEZP00000000    |                              |                                          |
| E. coli 9_90111   | AEZZ00000000    |                              |                                          |
| E. coli 99_0741   | AEZR00000000    |                              |                                          |
| E. coli AA86      | AFET00000000    | X                            |                                          |
| E. coli ABU_83972 | CP001671.1      | X                            |                                          |
| E. coli A_i1      | AEYT00000000    | X                            |                                          |
| E. coli AI27      | AJPQ00000000    | X                            |                                          |
| E. coli APEC_01   | NC_008563       |                              |                                          |
| E. coli ATCC_8739 | NC_010468.1     |                              |                                          |
| E. coli B088      | ACXE00000000    |                              |                                          |
| E. coli B093      | AEXF00000000    | X                            |                                          |
| E. coli B171      | NZ_AAJX00000000 |                              |                                          |
| E. coli B185      | ACXF00000000    | X                            |                                          |
| E. coli B354      | ACXG00000000    | X                            |                                          |
| E. coli B41       | AFAH00000000    | X                            |                                          |

|                   |                 |   |
|-------------------|-----------------|---|
| E. coli B7A       | NZ_AAJT00000000 |   |
| E. coli BL21      | NC_012947.1     |   |
| E. coli B_REL606  | NC_012967.1     |   |
| E. coli BW2952    | NC_012759.1     |   |
| E. coli CFT073    | NC_004431.1     |   |
| E. coli CUMT8     | AJWV00000000    |   |
| E. coli DH1       | CP001637.1      |   |
| E. coli D_i14     | CP002212.1      |   |
| E. coli D_i2      | CP002211.1      |   |
| E. coli E101      | AEXG00000000    | X |
| E. coli E110019   | AAJW00000000    | X |
| E. coli E1167     | AEHS00000000    | X |
| E. coli E128010   | ADUO00000000    | X |
| E. coli E1520     | AEHT00000000    | X |
| E. coli E22       | AAJV00000000    |   |
| E. coli E482      | AEHU00000000    | X |
| E. coli EC1734    | AKMO00000000    |   |
| E. coli EC1738    | AKMN00000000    | X |
| E. coli EC1845    | AKMP00000000    |   |
| E. coli EC1863    | AKMQ00000000    | X |
| E. coli EC4013    | AKMH00000000    | X |
| E. coli EC4100B   | AERU00000000    |   |
| E. coli EC4196    | AKMC00000000    | X |
| E. coli EC4203    | AKMB00000000    |   |
| E. coli EC4402    | AKMI00000000    | X |
| E. coli EC4421    | AKMF00000000    |   |
| E. coli EC4422    | AKMG00000000    | X |
| E. coli EC4436    | AKMK00000000    | X |
| E. coli EC4437    | AKML00000000    | X |
| E. coli EC4439    | AKMJ00000000    |   |
| E. coli ED1A      | NC_011745       |   |
| E. coli F11       | NZ_AAJU00000000 |   |
| E. coli FVEC1302  | ACXH00000000    |   |
| E. coli FVEC1412  | ACXI00000000    |   |
| E. coli G58_1     | AFDX00000000    | X |
| E. coli H10407    | FN649414.1      |   |
| E. coli H120      | AEHV00000000    |   |
| E. coli H252      | AEFI00000000    | X |
| E. coli H263      | AEFJ00000000    |   |
| E. coli H299      | ADBC00000000    |   |
| E. coli H30       | AEZM00000000    |   |
| E. coli H397      | AEXH00000000    | X |
| E. coli H489      | AEHX00000000    | X |
| E. coli H494      | AFQH00000000    | X |
| E. coli H591      | ADBB00000000    |   |
| E. coli H736      | ADAU00000000    |   |
| E. coli HM605     | AJWU00000000    |   |
| E. coli HS        | NC_009800       |   |
| E. coli IAI39     | NC_011750       |   |
| E. coli IHE3034   | CP001969.1      |   |
| E. coli J53       | AICK00000000    | X |
| E. coli JB1_95    | AEZV00000000    | X |
| E. coli K011      | NZ_AEDM00000000 |   |
| E. coli K12_DH10B | NC_010473.1     |   |

|                                |                 |   |
|--------------------------------|-----------------|---|
| E. coli K12_MG1655             | NC_000913.2     |   |
| E. coli K12_W3110              | AC_000091.1     |   |
| E. coli KD1                    | AJWO00000000    | X |
| E. coli KD2                    | AJWP00000000    | X |
| E. coli LCT_EC106              | AJRI00000000    | X |
| E. coli LF82                   | CU651637.1      | X |
| E. coli LT_68                  | ADUP00000000    | X |
| E. coli M605                   | NZ_ADAV00000000 |   |
| E. coli M718                   | NZ_ADAW00000000 |   |
| E. coli M863                   | AEHZ00000000    | X |
| E. coli M919                   | AEVZ00000000    | X |
| E. coli MS_107_1               | NZ_ADWV00000000 |   |
| E. coli MS_115_1               | NZ_ADTL00000000 |   |
| E. coli MS_116_1               | NZ_ADTZ00000000 |   |
| E. coli MS_119_7               | NZ_ADWU00000000 |   |
| E. coli MS_124_1               | NZ_ADWT00000000 |   |
| E. coli MS_146_1               | NZ_ADTN00000000 |   |
| E. coli MS_175_1               | NZ_ADUB00000000 |   |
| E. coli MS_182_1               | NZ_ADTM00000000 |   |
| E. coli MS_185_1               | NZ_ADUE00000000 |   |
| E. coli MS_187_1               | NZ_ADTQ00000000 |   |
| E. coli MS_196_1               | NZ_ADUD00000000 |   |
| E. coli MS_198_1               | NZ_ADTJ00000000 |   |
| E. coli MS_200_1               | NZ_ADUC00000000 |   |
| E. coli MS_21_1                | NZ_ADTR00000000 |   |
| E. coli MS_45_1                | NZ_ADTO00000000 |   |
| E. coli MS_69_1                | NZ_ADTP00000000 |   |
| E. coli MS_78_1                | NZ_ADTY00000000 |   |
| E. coli MS_84_1                | NZ_ADTK00000000 |   |
| E. coli NA114                  | CP002797.2      |   |
| E. coli NC101                  | NZ_AEFA00000000 |   |
| E. coli NCCP15647              | AJMB00000000    |   |
| E. coli O103_H2_12009          | NC_013353.1     |   |
| E. coli O103_H25_NIPH_11060424 | AGSG00000000    | X |
| E. coli O103_H2_CVM9450        | AJVR00000000    | X |
| E. coli O111_11128             | NC_013364.1     |   |
| E. coli O111_H8_CVM9574        | AJVV00000000    | X |
| E. coli O113_H21_CL3           | AGTH00000000    |   |
| E. coli O121_H19_MT2           | AGTJ00000000    | X |
| E. coli O145_H28_4865_96       | AGTL00000000    | X |
| E. coli O157_EC4115            | NC_011353.1     |   |
| E. coli O157_EDL933            | NC_002655.2     |   |
| E. coli O157_H7_sakai          | NC_002695.1     |   |
| E. coli O157_TW14359           | NC_013008.1     |   |
| E. coli O26_H11_11368          | NC_013361.1     |   |
| E. coli O26_H11_CVM9942        | AJVV00000000    | X |
| E. coli O32_H37_P4             | AJQW00000000    | X |
| E. coli O42                    | FN554766        |   |
| E. coli O45_H2_03_EN_705       | AGTK00000000    |   |
| E. coli O55_H7_3256_97         | AEUA00000000    |   |
| E. coli O55_H7_CB9615          | CP001846.1      |   |
| E. coli O55_RM12579            | CP003109.1      |   |
| E. coli O7_K1_CE10             | CP003034.1      |   |
| E. coli O83_H1_NRG_857C        | CP001855.1      |   |

|                      |                 |   |
|----------------------|-----------------|---|
| E. coli O91_H21_B2F1 | AGTI00000000    | X |
| E. coli OK1180       | ADUQ00000000    | X |
| E. coli OP50         | NZ_ADBT00000000 |   |
| E. coli P12b         | CP002291.1      |   |
| E. coli PA10         | AKLF00000000    |   |
| E. coli PCN033       | AFAT00000000    | X |
| E. coli S88          | NC_011742.1     |   |
| E. coli SCI_07       | AFJG00000000    |   |
| E. coli SE11         | NC_011415.1     |   |
| E. coli SE15         | AP009378.1      |   |
| E. coli SMS_3_5      | NC_010498.1     |   |
| E. coli TA007        | AEHY00000000    | X |
| E. coli TA124        | AFQI00000000    |   |
| E. coli TA143        | NZ_ADAY00000000 |   |
| E. coli TA206        | NZ_ADAX00000000 |   |
| E. coli TA271        | NZ_ADAZ00000000 |   |
| E. coli TA280        | NZ_ADBA00000000 |   |
| E. coli TX1999       | AFEB00000000    |   |
| E. coli TY_2482      | AFVR00000000    |   |
| E. coli UM146        | CP002167.1      | X |
| E. coli UMN026       | NC_011751.1     |   |
| E. coli UMN_F18      | AGTD00000000    |   |
| E. coli UMNK88_all   | CP002729.1      | X |
| E. coli UTI89        | NC_007946.1     |   |
| E. coli W26          | AGIA00000000    |   |
| E. coli W            | NZ_AEDF00000000 |   |
| E. coli WV_060327    | AERT00000000    |   |
| E. coli XH001        | AFYG00000000    | X |
| E. coli XH140A       | AFVX00000000    | X |
| E. coli Xuzhou21     | CP001925.1      |   |
| E. coli DEC10A       | AIGP00000000    |   |
| E. coli DEC10B       | AIGQ00000000    |   |
| E. coli DEC10C       | AIGR00000000    |   |
| E. coli DEC10D       | AIGS00000000    |   |
| E. coli DEC10E       | AIGT00000000    |   |
| E. coli DEC10F       | AIGU00000000    |   |
| E. coli DEC11A       | AIGV00000000    |   |
| E. coli DEC11B       | AIGW00000000    |   |
| E. coli DEC11C       | AIGX00000000    |   |
| E. coli DEC11D       | AIGY00000000    |   |
| E. coli DEC11E       | AIGZ00000000    |   |
| E. coli DEC12A       | AIHA00000000    |   |
| E. coli DEC12B       | AIHB00000000    |   |
| E. coli DEC12C       | AIHC00000000    |   |
| E. coli DEC12D       | AIHD00000000    |   |
| E. coli DEC12E       | AIHE00000000    |   |
| E. coli DEC13A       | AIHF00000000    |   |
| E. coli DEC13B       | AIHG00000000    |   |
| E. coli DEC13C       | AIHH00000000    |   |
| E. coli DEC13D       | AIHI00000000    |   |
| E. coli DEC13E       | AIHJ00000000    |   |
| E. coli DEC14A       | AIHK00000000    |   |
| E. coli DEC14B       | AIHL00000000    |   |
| E. coli DEC14C       | AIHM00000000    |   |

|                  |              |
|------------------|--------------|
| E. coli DEC14D   | AIHN00000000 |
| E. coli DEC15A   | AIHO00000000 |
| E. coli DEC15B   | AIHP00000000 |
| E. coli DEC15C   | AIHQ00000000 |
| E. coli DEC15D   | AIHR00000000 |
| E. coli DEC15E   | AIHS00000000 |
| E. coli DEC1A    | AIEV00000000 |
| E. coli DEC1B    | AIEW00000000 |
| E. coli DEC1C    | AIEX00000000 |
| E. coli DEC1D    | AIEY00000000 |
| E. coli DEC1E    | AIEZ00000000 |
| E. coli DEC2A    | AIFA00000000 |
| E. coli DEC2B    | AFJB00000000 |
| E. coli DEC2C    | AIFB00000000 |
| E. coli DEC2D    | AIFC00000000 |
| E. coli DEC2E    | AIFD00000000 |
| E. coli DEC3A    | AIFE00000000 |
| E. coli DEC3B    | AIFF00000000 |
| E. coli DEC3C    | AIFG00000000 |
| E. coli DEC3D    | AIFH00000000 |
| E. coli DEC3E    | AIFI00000000 |
| E. coli DEC3F    | AIFJ00000000 |
| E. coli DEC4A    | AIFK00000000 |
| E. coli DEC4B    | AIFL00000000 |
| E. coli DEC4C    | AIFM00000000 |
| E. coli DEC4D    | AIFN00000000 |
| E. coli DEC4E    | AIFO00000000 |
| E. coli DEC4F    | AIFP00000000 |
| E. coli DEC5A    | AIFQ00000000 |
| E. coli DEC5B    | AIFR00000000 |
| E. coli DEC5C    | AIFS00000000 |
| E. coli DEC5D    | AIFT00000000 |
| E. coli DEC5E    | AIFU00000000 |
| E. coli DEC6A    | AIFV00000000 |
| E. coli DEC6B    | AIFW00000000 |
| E. coli DEC6C    | AIFX00000000 |
| E. coli DEC6D    | AIFY00000000 |
| E. coli DEC6E    | AIFZ00000000 |
| E. coli DEC7A    | AIGA00000000 |
| E. coli DEC7B    | AIGB00000000 |
| E. coli DEC7C    | AIGC00000000 |
| E. coli DEC7D    | AIGD00000000 |
| E. coli DEC7E    | AIGE00000000 |
| E. coli DEC8A    | AIGF00000000 |
| E. coli DEC8B    | AIGG00000000 |
| E. coli DEC8C    | AIGH00000000 |
| E. coli DEC8D    | AIGI00000000 |
| E. coli DEC8E    | AIGJ00000000 |
| E. coli DEC9A    | AIGK00000000 |
| E. coli DEC9B    | AIGL00000000 |
| E. coli DEC9C    | AIGM00000000 |
| E. coli DEC9D    | AIGN00000000 |
| E. coli DEC9E    | AIGO00000000 |
| E. coli E2348/69 | NC_011601.1  |

|                            |                 |
|----------------------------|-----------------|
| E. coli E24377A            | NC_009801.1     |
| S. boydii ATCC_9905        | AERN00000000    |
| S. boydii 227              | NC_007613.1     |
| S. boydii 3083             | NC_010658.1     |
| S. dysenteriae 1012        | NZ_AAMJ00000000 |
| S. dysenteriae 197         | NC_007606.1     |
| S. dysenteriae CDC_74_1112 | AERM00000000    |
| S. flexneri 2002017        | CP001383.1      |
| S. flexneri 2A_2457T       | NC_004741.1     |
| S. flexneri 2A_301         | NC_004337.1     |
| S. flexneri 5_8401         | NC_008258.1     |
| S. flexneri 5A_M90T        | AGNM00000000    |
| S. flexneri CDC_796_83     | AERO00000000    |
| S. sonnei 046              | CP000641.1      |
| S. sonnei 53G_GB           | HE616529.1      |

---

|                       |           |   |
|-----------------------|-----------|---|
| S. flexneri ERR230566 | ERR230566 | X |
| ERR230573             | ERR230573 | X |
| ERR230580             | ERR230580 | X |
| ERR230485             | ERR230485 | X |
| ERR230491             | ERR230491 | X |
| ERR230496             | ERR230496 | X |
| ERR230515             | ERR230515 | X |
| ERR230530             | ERR230530 | X |
| ERR230536             | ERR230536 | X |
| ERR230542             | ERR230542 | X |
| ERR230548             | ERR230548 | X |
| ERR230554             | ERR230554 | X |
| ERR230560             | ERR230560 | X |
| ERR230567             | ERR230567 | X |
| ERR230574             | ERR230574 | X |
| ERR230486             | ERR230486 | X |
| ERR230492             | ERR230492 | X |
| ERR230497             | ERR230497 | X |
| ERR230498             | ERR230498 | X |
| ERR230499             | ERR230499 | X |
| ERR230500             | ERR230500 | X |
| ERR230501             | ERR230501 | X |
| ERR230502             | ERR230502 | X |
| ERR230503             | ERR230503 | X |
| ERR230504             | ERR230504 | X |
| ERR230505             | ERR230505 | X |
| ERR230506             | ERR230506 | X |
| ERR230507             | ERR230507 | X |
| ERR230508             | ERR230508 | X |
| ERR230509             | ERR230509 | X |
| ERR230510             | ERR230510 | X |
| ERR230511             | ERR230511 | X |
| ERR230516             | ERR230516 | X |
| ERR230531             | ERR230531 | X |
| ERR230537             | ERR230537 | X |
| ERR230543             | ERR230543 | X |
| ERR230549             | ERR230549 | X |

|           |           |   |
|-----------|-----------|---|
| ERR230555 | ERR230555 | X |
| ERR230561 | ERR230561 | X |
| ERR230568 | ERR230568 | X |
| ERR230575 | ERR230575 | X |
| ERR230487 | ERR230487 | X |
| ERR230493 | ERR230493 | X |
| ERR230532 | ERR230532 | X |
| ERR230538 | ERR230538 | X |
| ERR230544 | ERR230544 | X |
| ERR230550 | ERR230550 | X |
| ERR230556 | ERR230556 | X |
| ERR230562 | ERR230562 | X |
| ERR230569 | ERR230569 | X |
| ERR230576 | ERR230576 | X |
| ERR230488 | ERR230488 | X |
| ERR230494 | ERR230494 | X |
| ERR230512 | ERR230512 | X |
| ERR230513 | ERR230513 | X |
| ERR230514 | ERR230514 | X |
| ERR230519 | ERR230519 | X |
| ERR230533 | ERR230533 | X |
| ERR230539 | ERR230539 | X |
| ERR230545 | ERR230545 | X |
| ERR230551 | ERR230551 | X |
| ERR230557 | ERR230557 | X |
| ERR230563 | ERR230563 | X |
| ERR230570 | ERR230570 | X |
| ERR230577 | ERR230577 | X |
| ERR230489 | ERR230489 | X |
| ERR230495 | ERR230495 | X |
| ERR230517 | ERR230517 | X |
| ERR230518 | ERR230518 | X |
| ERR230528 | ERR230528 | X |
| ERR230534 | ERR230534 | X |
| ERR230540 | ERR230540 | X |
| ERR230546 | ERR230546 | X |
| ERR230552 | ERR230552 | X |
| ERR230558 | ERR230558 | X |
| ERR230564 | ERR230564 | X |
| ERR230571 | ERR230571 | X |
| ERR230578 | ERR230578 | X |
| ERR230490 | ERR230490 | X |
| ERR230520 | ERR230520 | X |
| ERR230521 | ERR230521 | X |
| ERR230522 | ERR230522 | X |
| ERR230523 | ERR230523 | X |
| ERR230524 | ERR230524 | X |
| ERR230525 | ERR230525 | X |
| ERR230526 | ERR230526 | X |
| ERR230527 | ERR230527 | X |
| ERR230529 | ERR230529 | X |
| ERR230535 | ERR230535 | X |
| ERR230541 | ERR230541 | X |
| ERR230547 | ERR230547 | X |

|           |           |   |
|-----------|-----------|---|
| ERR230553 | ERR230553 | X |
| ERR230559 | ERR230559 | X |
| ERR230565 | ERR230565 | X |
| ERR230572 | ERR230572 | X |
| ERR230579 | ERR230579 | X |



**Supplementary Table 2.** Genbank Accession details of MLST sequences

---

| Gene        | Reference sequence <sup>a</sup> | length (nt) | Type        |
|-------------|---------------------------------|-------------|-------------|
| <i>adk</i>  | AAQ90415                        | 536         | pubMLST     |
| <i>fumC</i> | AAQ90417                        | 469         | pubMLST     |
| <i>gyrB</i> | AEH96483                        | 460         | pubMLST     |
| <i>icd</i>  | AAQ90416                        | 518         | pubMLST     |
| <i>mdh</i>  | ABO70162                        | 452         | pubMLST     |
| <i>purA</i> | AAQ91337                        | 478         | pubMLST     |
| <i>recA</i> | AAQ91336                        | 510         | pubMLST     |
| <i>thrB</i> | SBO_0002                        | 933         | Pupo et al. |
| <i>thrC</i> | Z0004                           | 1287        | Pupo et al. |
| <i>trpC</i> | ECSE_1311                       | 1359        | Pupo et al. |
| <i>purM</i> | AF293168_1                      | 1038        | Pupo et al. |
| <i>purN</i> | EcHS_A2635                      | 639         | Pupo et al. |
| <i>mdh</i>  | UTI89_C3667                     | 939         | Pupo et al. |
| <i>argR</i> | B21_03048                       | 471         | Pupo et al. |

---

---

**Supplementary Table 3.** Polymerase chain reaction primers and associated targets

| clade            | gene                           | accession     | Forward (5'-3')          | Reverse (5'-3')         | amplicon length |
|------------------|--------------------------------|---------------|--------------------------|-------------------------|-----------------|
| S1               | type 3 restriction enzyme      | SB359474_4798 | CTTTC AACGCACGAATATCAAC  | CGGAAATTGTGAATCTGGTCTT  | 1008            |
| S2               | rhs core protein               | AAZ88369      | GCCCTTTAGCGGATCGTAGT     | CAGCTGCATATAACAGAGCAAA  | 561             |
| S3               | conserved hypothetical protein | ZP_03066781   | GATAATGGCGACGAAAGGAA     | GTAGCGAAACTGGTAGCGATG   | 334             |
| S4               | shiga-toxin 1 subunit A        | HM017965      | CAGCGTGTTGCAGGGATCAGTCG  | CGGACTCTCCATCTGCCGGACAC | 451             |
| S5               | putative periplasmic protein   | ADA72743      | CAATAACGAGCTACCGATTACCTT | CTTCAGCGGTGTTAAAGGTACAG | 808             |
| all              | lpaH3 invasion antigen         | N/A           | TGAGTTACCTGAATCACTGGAAG  | TCGAGGATGATAGTCAGGTC    | 180             |
| all*             | Invasion antigen               | N/A           | CCTTTTCCGCGTTCCTTGA      | CGGAATCCGGAGGTATTGC     | 60              |
| S1 - flexneri    | flexneri 6 O-antigen           | ACA24772.1    | AGGTTCTGGTTTGGGTAATGTC   | TCCTATACTTTGGGCTTCTGCT  | 511             |
| S1 - dysenteriae | putative prophage protein      | ECO42_3957    | ATATGTCGCCATTCGATTTACC   | CTCAATGTCTAAGCCAACAGGA  | 617             |
| S3 - boydii      | adhesin                        | CAQ32398      | CAGCAATTCGAAAGGATTAC     | GTTCACCCACCAACTCTTCAC   | 87              |
| S3 - dysenteriae | cox                            | CP001969      | CATTCAGGTAGCACCATATCCA   | GTTTCTCACCCGATAAACCCAGA | 479             |

\*Thiem *et al.* 2004

**Supplementary Table 4.** GenBank accession data for genes in the pan-genomes of *E. coli* and *Shigella*

| <i>Shigella</i> | <i>E. coli</i> |
|-----------------|----------------|
| YP_406252.1     | NP_414543.1    |
| YP_406369.1     | NP_414544.1    |
| YP_406566.1     | NP_414545.1    |
| YP_406567.1     | NP_414547.1    |
| YP_406568.1     | NP_414549.1    |
| YP_406570.1     | NP_414550.1    |
| YP_406573.1     | NP_414551.1    |
| YP_406574.1     | NP_414552.1    |
| YP_406575.1     | NP_414554.1    |
| YP_406579.1     | NP_414555.1    |
| YP_406582.1     | NP_414560.1    |
| YP_406583.1     | NP_414564.1    |
| YP_406588.1     | NP_414566.1    |
| YP_406589.1     | NP_414568.1    |
| YP_406591.1     | NP_414569.1    |
| YP_406592.1     | NP_414570.1    |
| YP_406593.1     | NP_414572.1    |
| YP_406594.1     | NP_414573.1    |
| YP_406595.1     | NP_414577.2    |
| YP_406596.1     | NP_414578.2    |
| YP_406601.1     | NP_414580.1    |
| YP_406602.1     | NP_414582.1    |
| YP_406603.1     | NP_414583.2    |
| YP_406604.1     | NP_414585.1    |
| YP_406605.1     | NP_414586.1    |
| YP_406606.1     | NP_414588.1    |
| YP_406607.1     | NP_414590.1    |
| YP_406608.1     | NP_414591.1    |
| YP_406610.1     | NP_414592.1    |
| YP_406612.1     | NP_414593.1    |
| YP_406613.1     | NP_414594.1    |
| YP_406613.1     | NP_414595.1    |
| YP_406616.1     | NP_414597.1    |
| YP_406617.1     | NP_414600.1    |
| YP_406618.1     | NP_414601.1    |
| YP_406620.1     | NP_414602.1    |
| YP_406622.1     | NP_414607.1    |
| YP_406623.1     | NP_414608.1    |
| YP_406623.1     | NP_414613.1    |

|             |             |
|-------------|-------------|
| YP_406624.2 | NP_414614.1 |
| YP_406625.1 | NP_414620.1 |
| YP_406628.1 | NP_414622.1 |
| YP_406629.1 | NP_414622.1 |
| YP_406631.1 | NP_414623.1 |
| YP_406632.1 | NP_414624.1 |
| YP_406633.1 | NP_414625.1 |
| YP_406634.1 | NP_414626.1 |
| YP_406635.1 | NP_414627.1 |
| YP_406636.1 | NP_414628.1 |
| YP_406637.1 | NP_414629.1 |
| YP_406638.1 | NP_414631.1 |
| YP_406641.1 | NP_414632.1 |
| YP_406642.1 | NP_414633.1 |
| YP_406643.1 | NP_414634.1 |
| YP_406644.1 | NP_414635.1 |
| YP_406645.1 | NP_414639.2 |
| YP_406650.1 | NP_414643.1 |
| YP_406651.1 | NP_414644.1 |
| YP_406652.1 | NP_414645.1 |
| YP_406653.1 | NP_414646.1 |
| YP_406655.1 | NP_414648.1 |
| YP_406659.1 | NP_414649.1 |
| YP_406660.1 | NP_414650.1 |
| YP_406661.1 | NP_414652.1 |
| YP_406662.1 | NP_414653.1 |
| YP_406663.1 | NP_414654.1 |
| YP_406664.1 | NP_414655.1 |
| YP_406666.1 | NP_414660.1 |
| YP_406667.1 | NP_414662.1 |
| YP_406668.1 | NP_414663.1 |
| YP_406669.2 | NP_414664.4 |
| YP_406670.1 | NP_414667.4 |
| YP_406671.1 | NP_414669.1 |
| YP_406672.1 | NP_414671.1 |
| YP_406675.2 | NP_414672.1 |
| YP_406677.1 | NP_414673.1 |
| YP_406678.1 | NP_414675.1 |
| YP_406679.1 | NP_414685.4 |
| YP_406680.1 | NP_414686.3 |
| YP_406689.1 | NP_414687.1 |
| YP_406689.1 | NP_414688.1 |
| YP_406690.1 | NP_414689.4 |

|             |             |
|-------------|-------------|
| YP_406691.2 | NP_414691.1 |
| YP_406692.1 | NP_414693.1 |
| YP_406693.1 | NP_414694.1 |
| YP_406694.1 | NP_414696.1 |
| YP_406695.1 | NP_414698.1 |
| YP_406696.1 | NP_414699.1 |
| YP_406697.1 | NP_414700.1 |
| YP_406698.1 | NP_414701.1 |
| YP_406699.1 | NP_414702.1 |
| YP_406701.1 | NP_414703.1 |
| YP_406703.1 | NP_414705.1 |
| YP_406704.1 | NP_414708.1 |
| YP_406705.1 | NP_414710.1 |
| YP_406706.1 | NP_414711.1 |
| YP_406706.1 | NP_414712.1 |
| YP_406707.1 | NP_414713.1 |
| YP_406710.1 | NP_414714.1 |
| YP_406712.1 | NP_414715.1 |
| YP_406713.1 | NP_414716.1 |
| YP_406714.1 | NP_414717.2 |
| YP_406715.1 | NP_414717.2 |
| YP_406716.1 | NP_414718.1 |
| YP_406717.1 | NP_414719.1 |
| YP_406718.1 | NP_414720.1 |
| YP_406719.1 | NP_414722.1 |
| YP_406720.1 | NP_414723.1 |
| YP_406721.2 | NP_414725.1 |
| YP_406721.2 | NP_414725.1 |
| YP_406723.1 | NP_414727.1 |
| YP_406725.1 | NP_414729.4 |
| YP_406726.1 | NP_414731.2 |
| YP_406727.1 | NP_414732.1 |
| YP_406728.1 | NP_414734.1 |
| YP_406729.1 | NP_414735.4 |
| YP_406730.1 | NP_414736.1 |
| YP_406731.1 | NP_414737.1 |
| YP_406732.2 | NP_414738.1 |
| YP_406734.1 | NP_414739.1 |
| YP_406735.1 | NP_414740.1 |
| YP_406736.1 | NP_414741.1 |
| YP_406737.1 | NP_414742.1 |
| YP_406738.1 | NP_414742.1 |
| YP_406739.1 | NP_414743.1 |

|             |             |
|-------------|-------------|
| YP_406740.1 | NP_414744.1 |
| YP_406741.1 | NP_414745.1 |
| YP_406742.1 | NP_414747.1 |
| YP_406743.1 | NP_414747.1 |
| YP_406744.1 | NP_414750.1 |
| YP_406745.1 | NP_414751.1 |
| YP_406747.1 | NP_414754.1 |
| YP_406748.1 | NP_414755.1 |
| YP_406749.1 | NP_414756.2 |
| YP_406751.1 | NP_414757.1 |
| YP_406753.1 | NP_414758.1 |
| YP_406754.1 | NP_414759.1 |
| YP_406755.1 | NP_414766.1 |
| YP_406759.1 | NP_414769.1 |
| YP_406762.1 | NP_414772.1 |
| YP_406763.1 | NP_414773.1 |
| YP_406764.1 | NP_414774.1 |
| YP_406766.1 | NP_414776.1 |
| YP_406787.1 | NP_414889.1 |
| YP_406788.1 | NP_414890.1 |
| YP_406789.1 | NP_414891.4 |
| YP_406790.1 | NP_414903.4 |
| YP_406793.1 | NP_414911.1 |
| YP_406806.1 | NP_414912.1 |
| YP_406812.1 | NP_414913.1 |
| YP_406814.1 | NP_414914.2 |
| YP_406815.1 | NP_414916.1 |
| YP_406816.1 | NP_414918.4 |
| YP_406817.1 | NP_414919.1 |
| YP_406818.1 | NP_414920.1 |
| YP_406819.1 | NP_414921.2 |
| YP_406820.1 | NP_414922.1 |
| YP_406824.1 | NP_414923.1 |
| YP_406825.2 | NP_414924.1 |
| YP_406826.1 | NP_414925.1 |
| YP_406827.1 | NP_414927.1 |
| YP_406828.1 | NP_414928.2 |
| YP_406829.1 | NP_414930.3 |
| YP_406830.1 | NP_414932.1 |
| YP_406831.1 | NP_414933.1 |
| YP_406833.1 | NP_414934.1 |
| YP_406837.1 | NP_414935.1 |
| YP_406838.1 | NP_414936.1 |

|             |             |
|-------------|-------------|
| YP_406839.1 | NP_414937.2 |
| YP_406840.1 | NP_414938.1 |
| YP_406841.1 | NP_414939.1 |
| YP_406842.1 | NP_414940.1 |
| YP_406843.1 | NP_414941.1 |
| YP_406844.1 | NP_414944.1 |
| YP_406845.1 | NP_414945.1 |
| YP_406846.1 | NP_414947.1 |
| YP_406847.2 | NP_414949.1 |
| YP_406848.1 | NP_414950.1 |
| YP_406849.1 | NP_414951.1 |
| YP_406850.1 | NP_414953.2 |
| YP_406851.1 | NP_414954.1 |
| YP_406852.1 | NP_414955.1 |
| YP_406853.1 | NP_414956.1 |
| YP_406855.1 | NP_414957.1 |
| YP_406855.1 | NP_414959.1 |
| YP_406856.1 | NP_414960.2 |
| YP_406857.1 | NP_414961.4 |
| YP_406858.1 | NP_414962.1 |
| YP_406859.1 | NP_414963.1 |
| YP_406860.1 | NP_414964.1 |
| YP_406868.1 | NP_414965.1 |
| YP_406869.2 | NP_414966.1 |
| YP_406870.2 | NP_414972.1 |
| YP_406874.1 | NP_414973.1 |
| YP_406875.1 | NP_414974.1 |
| YP_406876.1 | NP_414975.1 |
| YP_406877.1 | NP_414976.1 |
| YP_406879.1 | NP_414977.1 |
| YP_406880.1 | NP_414978.1 |
| YP_406883.1 | NP_414979.1 |
| YP_406883.1 | NP_414980.2 |
| YP_406886.1 | NP_414981.4 |
| YP_406888.1 | NP_414983.1 |
| YP_406889.1 | NP_414984.1 |
| YP_406899.1 | NP_414985.1 |
| YP_406900.1 | NP_414986.1 |
| YP_406901.1 | NP_414987.3 |
| YP_406902.1 | NP_414988.1 |
| YP_406903.1 | NP_414989.1 |
| YP_406904.1 | NP_414990.2 |
| YP_406907.1 | NP_414991.4 |

|             |             |
|-------------|-------------|
| YP_406909.1 | NP_414992.1 |
| YP_406911.1 | NP_414993.1 |
| YP_406912.1 | NP_414995.1 |
| YP_406913.1 | NP_414997.1 |
| YP_406914.1 | NP_415000.1 |
| YP_406916.1 | NP_415001.1 |
| YP_406917.1 | NP_415002.1 |
| YP_406918.1 | NP_415004.1 |
| YP_406921.1 | NP_415005.1 |
| YP_406922.1 | NP_415006.1 |
| YP_406923.1 | NP_415007.1 |
| YP_406925.1 | NP_415008.1 |
| YP_406926.1 | NP_415010.1 |
| YP_406926.1 | NP_415011.1 |
| YP_406928.1 | NP_415012.1 |
| YP_406930.1 | NP_415013.1 |
| YP_406931.1 | NP_415014.1 |
| YP_406932.1 | NP_415015.1 |
| YP_406933.1 | NP_415018.1 |
| YP_406934.1 | NP_415019.1 |
| YP_406950.1 | NP_415020.1 |
| YP_406951.2 | NP_415022.1 |
| YP_406952.1 | NP_415023.1 |
| YP_406953.1 | NP_415025.4 |
| YP_406954.1 | NP_415026.1 |
| YP_406955.1 | NP_415027.1 |
| YP_406957.1 | NP_415028.1 |
| YP_406957.1 | NP_415029.1 |
| YP_406984.1 | NP_415037.1 |
| YP_406986.1 | NP_415040.1 |
| YP_407000.1 | NP_415041.1 |
| YP_407001.1 | NP_415046.4 |
| YP_407002.1 | NP_415048.1 |
| YP_407016.1 | NP_415049.1 |
| YP_407017.1 | NP_415050.1 |
| YP_407018.1 | NP_415053.1 |
| YP_407019.1 | NP_415054.1 |
| YP_407020.1 | NP_415055.1 |
| YP_407021.1 | NP_415055.1 |
| YP_407023.2 | NP_415056.1 |
| YP_407024.1 | NP_415057.1 |
| YP_407025.1 | NP_415058.1 |
| YP_407025.1 | NP_415061.2 |



|             |             |
|-------------|-------------|
| YP_407027.1 | NP_415062.1 |
| YP_407028.1 | NP_415116.1 |
| YP_407029.1 | NP_415117.2 |
| YP_407031.1 | NP_415119.1 |
| YP_407032.1 | NP_415120.1 |
| YP_407033.1 | NP_415123.1 |
| YP_407035.1 | NP_415124.1 |
| YP_407044.1 | NP_415125.1 |
| YP_407048.1 | NP_415129.1 |
| YP_407049.1 | NP_415130.1 |
| YP_407050.1 | NP_415133.1 |
| YP_407051.1 | NP_415134.1 |
| YP_407052.1 | NP_415135.1 |
| YP_407053.1 | NP_415137.2 |
| YP_407057.1 | NP_415138.1 |
| YP_407059.1 | NP_415139.2 |
| YP_407059.1 | NP_415140.1 |
| YP_407060.1 | NP_415143.1 |
| YP_407064.1 | NP_415144.1 |
| YP_407069.1 | NP_415146.1 |
| YP_407072.1 | NP_415147.1 |
| YP_407079.1 | NP_415148.1 |
| YP_407083.1 | NP_415149.4 |
| YP_407084.1 | NP_415150.1 |
| YP_407086.1 | NP_415151.4 |
| YP_407087.1 | NP_415152.1 |
| YP_407089.1 | NP_415153.1 |
| YP_407090.1 | NP_415155.1 |
| YP_407091.1 | NP_415156.1 |
| YP_407094.1 | NP_415157.1 |
| YP_407095.1 | NP_415160.1 |
| YP_407096.1 | NP_415161.1 |
| YP_407098.1 | NP_415163.2 |
| YP_407099.1 | NP_415164.1 |
| YP_407100.1 | NP_415166.1 |
| YP_407101.1 | NP_415167.1 |
| YP_407102.1 | NP_415168.1 |
| YP_407103.1 | NP_415169.1 |
| YP_407107.1 | NP_415170.4 |
| YP_407108.1 | NP_415172.1 |
| YP_407109.1 | NP_415173.1 |
| YP_407110.1 | NP_415175.1 |
| YP_407117.1 | NP_415185.1 |

|             |             |
|-------------|-------------|
| YP_407117.1 | NP_415186.1 |
| YP_407118.1 | NP_415187.1 |
| YP_407119.1 | NP_415188.1 |
| YP_407120.1 | NP_415190.1 |
| YP_407121.1 | NP_415191.1 |
| YP_407122.1 | NP_415192.1 |
| YP_407123.1 | NP_415194.1 |
| YP_407124.1 | NP_415200.1 |
| YP_407125.1 | NP_415201.1 |
| YP_407126.1 | NP_415202.1 |
| YP_407128.1 | NP_415204.1 |
| YP_407129.1 | NP_415206.1 |
| YP_407130.1 | NP_415207.1 |
| YP_407131.1 | NP_415208.1 |
| YP_407132.1 | NP_415209.1 |
| YP_407162.1 | NP_415213.1 |
| YP_407167.1 | NP_415214.1 |
| YP_407168.1 | NP_415222.1 |
| YP_407169.1 | NP_415224.1 |
| YP_407170.1 | NP_415236.1 |
| YP_407171.1 | NP_415238.1 |
| YP_407172.1 | NP_415240.1 |
| YP_407173.1 | NP_415241.1 |
| YP_407174.1 | NP_415242.1 |
| YP_407175.1 | NP_415248.1 |
| YP_407176.1 | NP_415249.1 |
| YP_407177.1 | NP_415250.1 |
| YP_407178.1 | NP_415252.1 |
| YP_407179.1 | NP_415254.1 |
| YP_407180.1 | NP_415255.1 |
| YP_407183.1 | NP_415256.1 |
| YP_407186.1 | NP_415257.1 |
| YP_407187.1 | NP_415259.1 |
| YP_407188.1 | NP_415261.2 |
| YP_407189.1 | NP_415263.1 |
| YP_407191.1 | NP_415264.1 |
| YP_407193.1 | NP_415270.1 |
| YP_407194.1 | NP_415271.1 |
| YP_407194.1 | NP_415272.1 |
| YP_407195.1 | NP_415274.1 |
| YP_407199.1 | NP_415275.1 |
| YP_407200.1 | NP_415276.1 |
| YP_407202.1 | NP_415277.1 |

|             |             |
|-------------|-------------|
| YP_407204.1 | NP_415278.1 |
| YP_407205.1 | NP_415279.1 |
| YP_407207.1 | NP_415280.3 |
| YP_407208.1 | NP_415282.1 |
| YP_407209.1 | NP_415283.1 |
| YP_407211.1 | NP_415285.1 |
| YP_407212.1 | NP_415286.1 |
| YP_407215.1 | NP_415287.1 |
| YP_407216.1 | NP_415288.1 |
| YP_407217.2 | NP_415291.1 |
| YP_407218.1 | NP_415292.2 |
| YP_407218.1 | NP_415293.1 |
| YP_407219.1 | NP_415293.1 |
| YP_407220.1 | NP_415294.1 |
| YP_407222.1 | NP_415295.1 |
| YP_407224.1 | NP_415296.1 |
| YP_407235.1 | NP_415298.1 |
| YP_407237.1 | NP_415299.1 |
| YP_407238.1 | NP_415300.1 |
| YP_407242.1 | NP_415302.1 |
| YP_407243.1 | NP_415303.1 |
| YP_407282.1 | NP_415304.1 |
| YP_407283.1 | NP_415305.1 |
| YP_407284.1 | NP_415306.1 |
| YP_407285.1 | NP_415307.1 |
| YP_407288.1 | NP_415310.1 |
| YP_407290.2 | NP_415311.1 |
| YP_407291.1 | NP_415312.1 |
| YP_407293.1 | NP_415313.1 |
| YP_407294.1 | NP_415316.1 |
| YP_407294.1 | NP_415317.4 |
| YP_407296.1 | NP_415318.1 |
| YP_407297.1 | NP_415320.1 |
| YP_407298.1 | NP_415322.1 |
| YP_407299.1 | NP_415323.1 |
| YP_407300.1 | NP_415324.1 |
| YP_407301.1 | NP_415325.4 |
| YP_407303.1 | NP_415327.2 |
| YP_407304.1 | NP_415328.4 |
| YP_407305.1 | NP_415330.1 |
| YP_407306.1 | NP_415331.1 |
| YP_407307.2 | NP_415332.1 |
| YP_407308.1 | NP_415333.1 |

|             |             |
|-------------|-------------|
| YP_407310.1 | NP_415334.1 |
| YP_407311.1 | NP_415335.1 |
| YP_407312.2 | NP_415336.1 |
| YP_407314.1 | NP_415338.1 |
| YP_407315.1 | NP_415340.1 |
| YP_407316.1 | NP_415343.1 |
| YP_407317.1 | NP_415345.2 |
| YP_407318.1 | NP_415346.4 |
| YP_407319.1 | NP_415349.1 |
| YP_407321.1 | NP_415350.2 |
| YP_407322.1 | NP_415351.1 |
| YP_407324.1 | NP_415352.1 |
| YP_407325.1 | NP_415355.1 |
| YP_407326.1 | NP_415356.1 |
| YP_407386.1 | NP_415357.1 |
| YP_407386.1 | NP_415359.4 |
| YP_407403.1 | NP_415360.1 |
| YP_407403.1 | NP_415361.1 |
| YP_407405.1 | NP_415362.1 |
| YP_407417.1 | NP_415363.1 |
| YP_407491.1 | NP_415365.4 |
| YP_407493.1 | NP_415367.1 |
| YP_407495.1 | NP_415368.1 |
| YP_407498.1 | NP_415369.1 |
| YP_407499.1 | NP_415369.1 |
| YP_407544.1 | NP_415370.1 |
| YP_407562.1 | NP_415372.1 |
| YP_407564.1 | NP_415373.1 |
| YP_407565.1 | NP_415374.1 |
| YP_407565.1 | NP_415375.1 |
| YP_407566.2 | NP_415376.4 |
| YP_407568.1 | NP_415378.1 |
| YP_407570.1 | NP_415379.1 |
| YP_407571.1 | NP_415381.1 |
| YP_407572.1 | NP_415383.1 |
| YP_407573.1 | NP_415384.1 |
| YP_407574.1 | NP_415385.1 |
| YP_407591.1 | NP_415387.1 |
| YP_407592.1 | NP_415389.2 |
| YP_407593.1 | NP_415391.1 |
| YP_407596.1 | NP_415392.1 |
| YP_407597.1 | NP_415393.1 |
| YP_407598.1 | NP_415394.4 |

|             |             |
|-------------|-------------|
| YP_407609.1 | NP_415395.2 |
| YP_407610.1 | NP_415396.1 |
| YP_407611.1 | NP_415397.1 |
| YP_407611.1 | NP_415398.1 |
| YP_407612.1 | NP_415399.4 |
| YP_407617.1 | NP_415400.1 |
| YP_407618.1 | NP_415401.1 |
| YP_407621.1 | NP_415402.1 |
| YP_407623.1 | NP_415403.1 |
| YP_407624.1 | NP_415405.1 |
| YP_407624.1 | NP_415406.1 |
| YP_407625.1 | NP_415407.1 |
| YP_407628.1 | NP_415408.1 |
| YP_407629.1 | NP_415409.1 |
| YP_407630.2 | NP_415410.1 |
| YP_407635.1 | NP_415411.2 |
| YP_407636.1 | NP_415412.1 |
| YP_407637.2 | NP_415413.1 |
| YP_407638.1 | NP_415414.4 |
| YP_407639.1 | NP_415416.1 |
| YP_407640.1 | NP_415418.1 |
| YP_407649.1 | NP_415422.1 |
| YP_407650.1 | NP_415423.1 |
| YP_407651.1 | NP_415424.1 |
| YP_407652.1 | NP_415426.1 |
| YP_407653.1 | NP_415427.1 |
| YP_407685.1 | NP_415428.1 |
| YP_407686.1 | NP_415429.2 |
| YP_407687.1 | NP_415430.1 |
| YP_407688.1 | NP_415431.1 |
| YP_407689.1 | NP_415431.1 |
| YP_407700.1 | NP_415432.1 |
| YP_407700.1 | NP_415433.4 |
| YP_407701.1 | NP_415434.1 |
| YP_407702.1 | NP_415434.1 |
| YP_407703.1 | NP_415435.1 |
| YP_407705.1 | NP_415436.1 |
| YP_407705.1 | NP_415437.1 |
| YP_407706.1 | NP_415438.1 |
| YP_407708.1 | NP_415439.1 |
| YP_407711.1 | NP_415440.1 |
| YP_407726.1 | NP_415441.1 |
| YP_407727.1 | NP_415442.1 |

|             |             |
|-------------|-------------|
| YP_407728.1 | NP_415443.2 |
| YP_407729.1 | NP_415444.1 |
| YP_407735.1 | NP_415445.1 |
| YP_407739.1 | NP_415446.1 |
| YP_407744.1 | NP_415447.1 |
| YP_407766.1 | NP_415451.1 |
| YP_407768.1 | NP_415453.1 |
| YP_407771.1 | NP_415454.4 |
| YP_407772.1 | NP_415455.1 |
| YP_407773.1 | NP_415456.4 |
| YP_407775.1 | NP_415457.1 |
| YP_407776.1 | NP_415457.1 |
| YP_407777.1 | NP_415466.4 |
| YP_407778.1 | NP_415467.1 |
| YP_407784.1 | NP_415468.1 |
| YP_407785.1 | NP_415471.1 |
| YP_407787.1 | NP_415472.2 |
| YP_407787.1 | NP_415473.1 |
| YP_407788.1 | NP_415478.1 |
| YP_407790.1 | NP_415479.1 |
| YP_407791.1 | NP_415480.2 |
| YP_407792.1 | NP_415480.2 |
| YP_407796.1 | NP_415481.1 |
| YP_407797.1 | NP_415482.1 |
| YP_407798.1 | NP_415483.2 |
| YP_407799.1 | NP_415484.1 |
| YP_407799.1 | NP_415485.4 |
| YP_407800.1 | NP_415486.4 |
| YP_407801.1 | NP_415489.4 |
| YP_407802.1 | NP_415490.1 |
| YP_407803.1 | NP_415493.1 |
| YP_407804.1 | NP_415495.1 |
| YP_407805.1 | NP_415496.1 |
| YP_407813.1 | NP_415497.1 |
| YP_407813.1 | NP_415498.1 |
| YP_407814.2 | NP_415500.1 |
| YP_407815.1 | NP_415509.1 |
| YP_407818.1 | NP_415510.1 |
| YP_407819.1 | NP_415514.1 |
| YP_407826.1 | NP_415516.1 |
| YP_407827.1 | NP_415517.1 |
| YP_407829.1 | NP_415518.1 |
| YP_407830.1 | NP_415519.1 |

|             |             |
|-------------|-------------|
| YP_407831.1 | NP_415520.1 |
| YP_407832.1 | NP_415520.1 |
| YP_407869.1 | NP_415523.1 |
| YP_407870.1 | NP_415524.1 |
| YP_407874.1 | NP_415528.1 |
| YP_407875.1 | NP_415529.1 |
| YP_407886.1 | NP_415531.2 |
| YP_407890.1 | NP_415532.3 |
| YP_407891.1 | NP_415533.1 |
| YP_407892.1 | NP_415534.1 |
| YP_407895.1 | NP_415537.1 |
| YP_407896.1 | NP_415538.1 |
| YP_407898.1 | NP_415539.1 |
| YP_407900.1 | NP_415565.1 |
| YP_407901.1 | NP_415566.1 |
| YP_407913.1 | NP_415567.1 |
| YP_407914.1 | NP_415568.1 |
| YP_407915.1 | NP_415569.4 |
| YP_407916.1 | NP_415571.1 |
| YP_407917.1 | NP_415572.1 |
| YP_407918.1 | NP_415573.1 |
| YP_407919.1 | NP_415574.1 |
| YP_407921.1 | NP_415575.1 |
| YP_407925.1 | NP_415576.1 |
| YP_407928.1 | NP_415577.1 |
| YP_407929.1 | NP_415580.1 |
| YP_407930.1 | NP_415581.1 |
| YP_407931.1 | NP_415582.1 |
| YP_407933.1 | NP_415583.4 |
| YP_407936.1 | NP_415584.1 |
| YP_407936.1 | NP_415585.1 |
| YP_407937.2 | NP_415586.1 |
| YP_407938.1 | NP_415587.1 |
| YP_407939.1 | NP_415588.1 |
| YP_407941.1 | NP_415590.1 |
| YP_407943.1 | NP_415591.1 |
| YP_407943.1 | NP_415592.1 |
| YP_407944.1 | NP_415593.1 |
| YP_407944.1 | NP_415597.1 |
| YP_407945.1 | NP_415598.3 |
| YP_407946.1 | NP_415599.1 |
| YP_407947.1 | NP_415601.1 |
| YP_407948.1 | NP_415602.1 |

|             |             |
|-------------|-------------|
| YP_407949.1 | NP_415606.1 |
| YP_407951.1 | NP_415607.1 |
| YP_407952.1 | NP_415618.1 |
| YP_407953.1 | NP_415619.1 |
| YP_407954.1 | NP_415621.3 |
| YP_407956.1 | NP_415622.1 |
| YP_407957.1 | NP_415623.1 |
| YP_407966.1 | NP_415624.1 |
| YP_407967.1 | NP_415625.1 |
| YP_407968.1 | NP_415627.1 |
| YP_407969.1 | NP_415628.1 |
| YP_407970.1 | NP_415629.4 |
| YP_407971.1 | NP_415630.1 |
| YP_407974.1 | NP_415632.1 |
| YP_407975.1 | NP_415633.1 |
| YP_407976.1 | NP_415634.1 |
| YP_407977.1 | NP_415635.4 |
| YP_407978.1 | NP_415636.1 |
| YP_407980.1 | NP_415637.1 |
| YP_407981.1 | NP_415641.1 |
| YP_407982.1 | NP_415642.1 |
| YP_407986.2 | NP_415643.3 |
| YP_407990.2 | NP_415644.1 |
| YP_407991.1 | NP_415646.4 |
| YP_407998.1 | NP_415647.1 |
| YP_408003.1 | NP_415648.1 |
| YP_408004.1 | NP_415649.1 |
| YP_408005.1 | NP_415650.1 |
| YP_408015.1 | NP_415651.4 |
| YP_408020.1 | NP_415653.4 |
| YP_408021.1 | NP_415654.1 |
| YP_408022.1 | NP_415692.1 |
| YP_408035.1 | NP_415693.1 |
| YP_408045.1 | NP_415694.1 |
| YP_408050.1 | NP_415695.1 |
| YP_408051.1 | NP_415696.1 |
| YP_408052.1 | NP_415697.4 |
| YP_408053.1 | NP_415699.5 |
| YP_408062.1 | NP_415701.1 |
| YP_408161.1 | NP_415702.1 |
| YP_408161.1 | NP_415703.3 |
| YP_408162.1 | NP_415705.1 |
| YP_408177.1 | NP_415706.1 |



|             |             |
|-------------|-------------|
| YP_408185.1 | NP_415707.1 |
| YP_408186.1 | NP_415708.1 |
| YP_408187.1 | NP_415709.2 |
| YP_408188.2 | NP_415710.1 |
| YP_408189.1 | NP_415711.2 |
| YP_408190.1 | NP_415721.1 |
| YP_408192.1 | NP_415722.1 |
| YP_408194.1 | NP_415725.1 |
| YP_408196.1 | NP_415729.1 |
| YP_408196.1 | NP_415730.1 |
| YP_408197.1 | NP_415731.1 |
| YP_408199.1 | NP_415732.1 |
| YP_408200.1 | NP_415733.1 |
| YP_408202.1 | NP_415734.1 |
| YP_408203.2 | NP_415735.1 |
| YP_408204.1 | NP_415737.1 |
| YP_408207.1 | NP_415738.2 |
| YP_408208.1 | NP_415739.1 |
| YP_408210.1 | NP_415741.1 |
| YP_408211.1 | NP_415743.1 |
| YP_408211.1 | NP_415744.1 |
| YP_408212.1 | NP_415745.1 |
| YP_408213.1 | NP_415749.1 |
| YP_408219.1 | NP_415751.1 |
| YP_408220.1 | NP_415752.1 |
| YP_408222.1 | NP_415753.1 |
| YP_408223.1 | NP_415754.1 |
| YP_408226.1 | NP_415757.1 |
| YP_408231.1 | NP_415758.1 |
| YP_408232.1 | NP_415759.1 |
| YP_408233.1 | NP_415760.1 |
| YP_408236.1 | NP_415761.1 |
| YP_408243.1 | NP_415763.1 |
| YP_408245.1 | NP_415764.4 |
| YP_408245.1 | NP_415766.1 |
| YP_408246.2 | NP_415767.2 |
| YP_408247.1 | NP_415768.1 |
| YP_408248.1 | NP_415769.1 |
| YP_408249.1 | NP_415771.1 |
| YP_408250.1 | NP_415776.1 |
| YP_408251.1 | NP_415777.1 |
| YP_408258.1 | NP_415779.1 |
| YP_408259.1 | NP_415780.1 |

|             |             |
|-------------|-------------|
| YP_408260.1 | NP_415782.1 |
| YP_408261.1 | NP_415783.6 |
| YP_408262.1 | NP_415786.1 |
| YP_408263.1 | NP_415787.1 |
| YP_408264.1 | NP_415789.1 |
| YP_408265.1 | NP_415791.1 |
| YP_408266.1 | NP_415793.1 |
| YP_408267.1 | NP_415794.1 |
| YP_408268.1 | NP_415795.1 |
| YP_408269.1 | NP_415796.1 |
| YP_408270.1 | NP_415797.1 |
| YP_408271.1 | NP_415798.2 |
| YP_408273.1 | NP_415800.1 |
| YP_408274.1 | NP_415801.1 |
| YP_408275.1 | NP_415802.1 |
| YP_408276.1 | NP_415804.1 |
| YP_408278.1 | NP_415806.1 |
| YP_408279.1 | NP_415807.1 |
| YP_408280.1 | NP_415808.1 |
| YP_408283.1 | NP_415809.1 |
| YP_408283.1 | NP_415810.1 |
| YP_408286.1 | NP_415811.1 |
| YP_408287.1 | NP_415897.1 |
| YP_408288.1 | NP_415898.1 |
| YP_408289.1 | NP_415930.1 |
| YP_408290.1 | NP_415931.4 |
| YP_408297.1 | NP_415932.1 |
| YP_408302.1 | NP_415935.2 |
| YP_408303.1 | NP_415936.1 |
| YP_408306.1 | NP_415939.2 |
| YP_408308.1 | NP_415940.1 |
| YP_408309.1 | NP_415941.5 |
| YP_408310.1 | NP_415944.1 |
| YP_408315.1 | NP_415945.1 |
| YP_408316.1 | NP_415946.1 |
| YP_408317.1 | NP_415947.1 |
| YP_408324.1 | NP_415951.1 |
| YP_408325.1 | NP_415952.2 |
| YP_408326.1 | NP_415953.1 |
| YP_408327.2 | NP_415956.1 |
| YP_408328.1 | NP_415957.1 |
| YP_408329.1 | NP_415960.1 |
| YP_408330.1 | NP_415961.1 |

|             |             |
|-------------|-------------|
| YP_408331.1 | NP_415962.2 |
| YP_408333.1 | NP_415963.1 |
| YP_408333.1 | NP_415965.1 |
| YP_408336.1 | NP_415969.1 |
| YP_408337.1 | NP_415970.4 |
| YP_408357.1 | NP_415991.1 |
| YP_408358.1 | NP_415993.1 |
| YP_408359.1 | NP_415994.4 |
| YP_408360.1 | NP_415995.4 |
| YP_408360.1 | NP_415997.1 |
| YP_408361.1 | NP_415998.4 |
| YP_408362.2 | NP_416005.1 |
| YP_408363.1 | NP_416008.1 |
| YP_408365.1 | NP_416009.1 |
| YP_408367.1 | NP_416014.4 |
| YP_408368.1 | NP_416037.2 |
| YP_408369.1 | NP_416040.1 |
| YP_408370.1 | NP_416041.1 |
| YP_408371.2 | NP_416046.1 |
| YP_408372.1 | NP_416047.4 |
| YP_408373.1 | NP_416048.2 |
| YP_408374.1 | NP_416049.1 |
| YP_408375.1 | NP_416050.4 |
| YP_408376.1 | NP_416051.1 |
| YP_408379.1 | NP_416052.1 |
| YP_408380.1 | NP_416056.1 |
| YP_408381.1 | NP_416057.1 |
| YP_408383.1 | NP_416059.1 |
| YP_408384.1 | NP_416060.1 |
| YP_408385.1 | NP_416099.1 |
| YP_408386.1 | NP_416100.1 |
| YP_408387.1 | NP_416103.2 |
| YP_408395.1 | NP_416107.1 |
| YP_408400.1 | NP_416108.2 |
| YP_408400.1 | NP_416110.4 |
| YP_408401.1 | NP_416112.1 |
| YP_408404.1 | NP_416113.1 |
| YP_408406.1 | NP_416113.1 |
| YP_408407.1 | NP_416115.1 |
| YP_408407.1 | NP_416116.1 |
| YP_408409.1 | NP_416117.1 |
| YP_408409.1 | NP_416118.1 |
| YP_408412.1 | NP_416119.1 |

|             |             |
|-------------|-------------|
| YP_408413.1 | NP_416121.1 |
| YP_408413.1 | NP_416122.1 |
| YP_408414.1 | NP_416123.1 |
| YP_408415.1 | NP_416124.1 |
| YP_408416.2 | NP_416125.2 |
| YP_408417.1 | NP_416127.1 |
| YP_408419.1 | NP_416128.1 |
| YP_408420.1 | NP_416129.1 |
| YP_408421.1 | NP_416130.3 |
| YP_408425.1 | NP_416131.1 |
| YP_408427.1 | NP_416135.1 |
| YP_408432.1 | NP_416138.1 |
| YP_408433.1 | NP_416140.1 |
| YP_408434.1 | NP_416141.4 |
| YP_408435.1 | NP_416142.1 |
| YP_408445.1 | NP_416143.2 |
| YP_408446.1 | NP_416144.1 |
| YP_408447.1 | NP_416145.1 |
| YP_408447.1 | NP_416146.1 |
| YP_408459.1 | NP_416148.1 |
| YP_408460.1 | NP_416149.1 |
| YP_408461.1 | NP_416150.1 |
| YP_408462.1 | NP_416152.1 |
| YP_408464.1 | NP_416153.1 |
| YP_408466.1 | NP_416155.1 |
| YP_408468.1 | NP_416156.4 |
| YP_408472.1 | NP_416159.2 |
| YP_408475.1 | NP_416160.1 |
| YP_408475.1 | NP_416163.1 |
| YP_408475.1 | NP_416163.1 |
| YP_408478.1 | NP_416165.2 |
| YP_408478.1 | NP_416166.3 |
| YP_408485.1 | NP_416167.1 |
| YP_408489.1 | NP_416168.1 |
| YP_408490.1 | NP_416169.1 |
| YP_408491.1 | NP_416171.1 |
| YP_408495.2 | NP_416173.1 |
| YP_408496.1 | NP_416175.1 |
| YP_408497.1 | NP_416176.1 |
| YP_408503.1 | NP_416178.1 |
| YP_408503.1 | NP_416179.1 |
| YP_408503.1 | NP_416181.1 |
| YP_408505.1 | NP_416188.1 |

|             |             |
|-------------|-------------|
| YP_408506.1 | NP_416189.1 |
| YP_408507.1 | NP_416190.1 |
| YP_408508.1 | NP_416191.1 |
| YP_408509.1 | NP_416194.1 |
| YP_408510.2 | NP_416195.1 |
| YP_408511.1 | NP_416197.1 |
| YP_408512.1 | NP_416198.2 |
| YP_408513.1 | NP_416199.1 |
| YP_408514.1 | NP_416200.2 |
| YP_408515.1 | NP_416201.1 |
| YP_408516.1 | NP_416203.1 |
| YP_408517.1 | NP_416204.2 |
| YP_408518.1 | NP_416208.1 |
| YP_408519.1 | NP_416209.1 |
| YP_408520.1 | NP_416210.4 |
| YP_408541.1 | NP_416212.1 |
| YP_408542.1 | NP_416213.1 |
| YP_408543.1 | NP_416214.1 |
| YP_408543.1 | NP_416215.1 |
| YP_408544.1 | NP_416216.4 |
| YP_408545.1 | NP_416216.4 |
| YP_408546.1 | NP_416217.1 |
| YP_408547.1 | NP_416218.1 |
| YP_408548.1 | NP_416219.1 |
| YP_408549.1 | NP_416221.1 |
| YP_408550.1 | NP_416224.1 |
| YP_408552.1 | NP_416225.1 |
| YP_408552.1 | NP_416226.1 |
| YP_408553.1 | NP_416227.1 |
| YP_408554.1 | NP_416228.1 |
| YP_408555.1 | NP_416229.1 |
| YP_408556.1 | NP_416231.1 |
| YP_408557.2 | NP_416232.3 |
| YP_408559.1 | NP_416233.1 |
| YP_408561.1 | NP_416234.1 |
| YP_408570.1 | NP_416236.1 |
| YP_408571.1 | NP_416237.3 |
| YP_408572.1 | NP_416238.1 |
| YP_408573.1 | NP_416239.1 |
| YP_408574.1 | NP_416240.1 |
| YP_408575.1 | NP_416241.1 |
| YP_408579.1 | NP_416242.6 |
| YP_408587.1 | NP_416243.1 |

|             |             |
|-------------|-------------|
| YP_408589.1 | NP_416245.2 |
| YP_408589.1 | NP_416249.1 |
| YP_408589.1 | NP_416250.1 |
| YP_408590.1 | NP_416252.1 |
| YP_408592.1 | NP_416253.1 |
| YP_408593.1 | NP_416254.1 |
| YP_408596.1 | NP_416255.1 |
| YP_408597.1 | NP_416256.2 |
| YP_408598.1 | NP_416256.2 |
| YP_408599.2 | NP_416257.1 |
| YP_408600.1 | NP_416258.1 |
| YP_408600.1 | NP_416259.1 |
| YP_408601.1 | NP_416261.1 |
| YP_408602.1 | NP_416262.1 |
| YP_408603.1 | NP_416263.1 |
| YP_408604.1 | NP_416268.2 |
| YP_408605.1 | NP_416269.4 |
| YP_408606.1 | NP_416270.1 |
| YP_408607.1 | NP_416271.4 |
| YP_408608.1 | NP_416274.1 |
| YP_408609.1 | NP_416275.1 |
| YP_408614.1 | NP_416277.1 |
| YP_408615.1 | NP_416278.1 |
| YP_408616.1 | NP_416280.1 |
| YP_408617.1 | NP_416281.1 |
| YP_408618.1 | NP_416282.4 |
| YP_408619.1 | NP_416291.4 |
| YP_408620.1 | NP_416292.1 |
| YP_408621.1 | NP_416293.1 |
| YP_408625.1 | NP_416294.4 |
| YP_408626.1 | NP_416295.1 |
| YP_408640.1 | NP_416296.1 |
| YP_408643.1 | NP_416298.1 |
| YP_408644.1 | NP_416300.2 |
| YP_408644.1 | NP_416301.1 |
| YP_408645.1 | NP_416304.1 |
| YP_408646.1 | NP_416305.1 |
| YP_408649.1 | NP_416307.1 |
| YP_408653.1 | NP_416309.1 |
| YP_408654.2 | NP_416312.1 |
| YP_408655.1 | NP_416318.1 |
| YP_408657.1 | NP_416319.1 |
| YP_408658.1 | NP_416321.1 |

|             |             |
|-------------|-------------|
| YP_408659.1 | NP_416322.1 |
| YP_408660.2 | NP_416324.2 |
| YP_408661.1 | NP_416325.1 |
| YP_408662.1 | NP_416326.1 |
| YP_408669.1 | NP_416327.1 |
| YP_408671.1 | NP_416328.1 |
| YP_408672.1 | NP_416329.4 |
| YP_408673.1 | NP_416331.1 |
| YP_408674.1 | NP_416332.1 |
| YP_408676.1 | NP_416333.4 |
| YP_408677.1 | NP_416334.1 |
| YP_408678.1 | NP_416335.4 |
| YP_408684.1 | NP_416343.1 |
| YP_408686.1 | NP_416346.4 |
| YP_408690.1 | NP_416347.1 |
| YP_408691.1 | NP_416349.2 |
| YP_408692.1 | NP_416350.4 |
| YP_408693.1 | NP_416351.2 |
| YP_408695.1 | NP_416352.4 |
| YP_408696.1 | NP_416352.4 |
| YP_408701.2 | NP_416353.1 |
| YP_408703.1 | NP_416354.1 |
| YP_408703.1 | NP_416355.1 |
| YP_408704.1 | NP_416356.1 |
| YP_408705.1 | NP_416357.1 |
| YP_408706.1 | NP_416358.1 |
| YP_408708.1 | NP_416359.1 |
| YP_408709.1 | NP_416360.1 |
| YP_408710.1 | NP_416361.2 |
| YP_408714.1 | NP_416362.1 |
| YP_408715.1 | NP_416364.1 |
| YP_408716.1 | NP_416365.1 |
| YP_408719.1 | NP_416367.1 |
| YP_408720.2 | NP_416368.1 |
| YP_408721.1 | NP_416369.1 |
| YP_408722.1 | NP_416370.2 |
| YP_408723.1 | NP_416371.4 |
| YP_408724.2 | NP_416372.1 |
| YP_408726.1 | NP_416373.1 |
| YP_408729.1 | NP_416374.1 |
| YP_408730.1 | NP_416375.1 |
| YP_408734.1 | NP_416377.1 |
| YP_408735.1 | NP_416379.1 |

|             |             |
|-------------|-------------|
| YP_408736.1 | NP_416380.1 |
| YP_408737.1 | NP_416383.4 |
| YP_408738.1 | NP_416384.1 |
| YP_408739.1 | NP_416385.1 |
| YP_408740.1 | NP_416387.1 |
| YP_408741.1 | NP_416389.4 |
| YP_408742.2 | NP_416390.1 |
| YP_408743.1 | NP_416392.1 |
| YP_408744.1 | NP_416393.1 |
| YP_408746.1 | NP_416393.1 |
| YP_408747.1 | NP_416394.1 |
| YP_408748.1 | NP_416395.1 |
| YP_408749.1 | NP_416396.1 |
| YP_408751.1 | NP_416397.1 |
| YP_408752.2 | NP_416398.1 |
| YP_408753.1 | NP_416400.1 |
| YP_408754.1 | NP_416401.1 |
| YP_408754.1 | NP_416402.1 |
| YP_408755.1 | NP_416402.1 |
| YP_408756.1 | NP_416403.1 |
| YP_408757.1 | NP_416404.1 |
| YP_408758.1 | NP_416405.1 |
| YP_408759.1 | NP_416406.4 |
| YP_408767.1 | NP_416409.1 |
| YP_408768.1 | NP_416411.1 |
| YP_408770.1 | NP_416413.1 |
| YP_408771.1 | NP_416414.1 |
| YP_408778.1 | NP_416415.1 |
| YP_408779.1 | NP_416416.2 |
| YP_408783.1 | NP_416417.1 |
| YP_408784.1 | NP_416418.1 |
| YP_408785.1 | NP_416419.1 |
| YP_408788.1 | NP_416421.1 |
| YP_408789.1 | NP_416423.4 |
| YP_408790.1 | NP_416424.1 |
| YP_408792.1 | NP_416425.1 |
| YP_408793.2 | NP_416426.1 |
| YP_408794.1 | NP_416427.1 |
| YP_408795.1 | NP_416428.1 |
| YP_408796.1 | NP_416429.4 |
| YP_408802.1 | NP_416430.1 |
| YP_408803.1 | NP_416432.3 |
| YP_408807.1 | NP_416435.1 |



|             |             |
|-------------|-------------|
| YP_408810.1 | NP_416436.1 |
| YP_408811.1 | NP_416437.1 |
| YP_408813.1 | NP_416437.1 |
| YP_408814.1 | NP_416439.1 |
| YP_408815.1 | NP_416440.1 |
| YP_408818.1 | NP_416489.1 |
| YP_408818.1 | NP_416490.1 |
| YP_408820.1 | NP_416496.1 |
| YP_408822.1 | NP_416497.1 |
| YP_408823.1 | NP_416511.4 |
| YP_408824.1 | NP_416512.1 |
| YP_408827.1 | NP_416513.1 |
| YP_408828.1 | NP_416514.4 |
| YP_408830.1 | NP_416515.1 |
| YP_408834.1 | NP_416519.4 |
| YP_408836.1 | NP_416570.2 |
| YP_408836.1 | NP_416577.1 |
| YP_408837.1 | NP_416580.1 |
| YP_408838.1 | NP_416583.1 |
| YP_408839.1 | NP_416584.4 |
| YP_408840.2 | NP_416585.1 |
| YP_408841.1 | NP_416590.1 |
| YP_408842.1 | NP_416602.1 |
| YP_408843.1 | NP_416603.1 |
| YP_408845.1 | NP_416605.2 |
| YP_408863.1 | NP_416606.1 |
| YP_408864.1 | NP_416607.1 |
| YP_408864.1 | NP_416608.1 |
| YP_408865.1 | NP_416617.1 |
| YP_408866.1 | NP_416628.1 |
| YP_408867.2 | NP_416629.4 |
| YP_408868.2 | NP_416630.1 |
| YP_408869.1 | NP_416632.1 |
| YP_408871.1 | NP_416635.1 |
| YP_408872.1 | NP_416636.1 |
| YP_408872.1 | NP_416638.4 |
| YP_408873.1 | NP_416639.2 |
| YP_408874.2 | NP_416640.2 |
| YP_408875.1 | NP_416641.1 |
| YP_408880.1 | NP_416645.1 |
| YP_408880.1 | NP_416646.1 |
| YP_408881.1 | NP_416647.1 |
| YP_408883.1 | NP_416648.1 |

|             |             |
|-------------|-------------|
| YP_408883.1 | NP_416649.1 |
| YP_408885.1 | NP_416650.1 |
| YP_408887.1 | NP_416651.1 |
| YP_408888.1 | NP_416652.4 |
| YP_408889.1 | NP_416653.1 |
| YP_408890.1 | NP_416654.1 |
| YP_408891.1 | NP_416655.1 |
| YP_408892.2 | NP_416656.1 |
| YP_408893.1 | NP_416657.1 |
| YP_408894.1 | NP_416658.1 |
| YP_408895.1 | NP_416659.1 |
| YP_408896.1 | NP_416661.1 |
| YP_408903.1 | NP_416663.1 |
| YP_408904.1 | NP_416664.1 |
| YP_408905.1 | NP_416672.1 |
| YP_408906.1 | NP_416674.1 |
| YP_408907.2 | NP_416676.4 |
| YP_408908.1 | NP_416677.1 |
| YP_408909.1 | NP_416678.1 |
| YP_408910.1 | NP_416679.4 |
| YP_408911.1 | NP_416680.1 |
| YP_408912.1 | NP_416681.1 |
| YP_408913.1 | NP_416682.4 |
| YP_408914.1 | NP_416684.1 |
| YP_408917.2 | NP_416685.1 |
| YP_408918.2 | NP_416686.1 |
| YP_408919.2 | NP_416687.1 |
| YP_408920.1 | NP_416688.1 |
| YP_408921.1 | NP_416690.1 |
| YP_408922.1 | NP_416691.1 |
| YP_408923.1 | NP_416692.1 |
| YP_408924.1 | NP_416697.1 |
| YP_408925.1 | NP_416698.1 |
| YP_408926.1 | NP_416699.1 |
| YP_408927.1 | NP_416700.1 |
| YP_408928.1 | NP_416701.1 |
| YP_408929.1 | NP_416702.1 |
| YP_408930.1 | NP_416703.1 |
| YP_408931.2 | NP_416704.1 |
| YP_408932.1 | NP_416705.2 |
| YP_408950.1 | NP_416706.1 |
| YP_408951.1 | NP_416707.4 |
| YP_408952.1 | NP_416708.1 |

|             |             |
|-------------|-------------|
| YP_408953.1 | NP_416710.1 |
| YP_408954.1 | NP_416712.1 |
| YP_408955.1 | NP_416713.1 |
| YP_408957.1 | NP_416714.1 |
| YP_408958.1 | NP_416715.1 |
| YP_408959.2 | NP_416716.1 |
| YP_408960.2 | NP_416717.1 |
| YP_408960.2 | NP_416718.1 |
| YP_408961.1 | NP_416722.2 |
| YP_408962.1 | NP_416733.4 |
| YP_408963.1 | NP_416735.1 |
| YP_408964.1 | NP_416738.1 |
| YP_408965.1 | NP_416739.1 |
| YP_408966.1 | NP_416742.1 |
| YP_408967.1 | NP_416745.1 |
| YP_408968.1 | NP_416752.1 |
| YP_408969.1 | NP_416754.1 |
| YP_408970.1 | NP_416755.1 |
| YP_408971.1 | NP_416756.5 |
| YP_408972.1 | NP_416758.1 |
| YP_408975.1 | NP_416760.1 |
| YP_408976.1 | NP_416761.4 |
| YP_408980.1 | NP_416762.2 |
| YP_408981.1 | NP_416764.1 |
| YP_408982.1 | NP_416765.1 |
| YP_408984.1 | NP_416767.1 |
| YP_408984.1 | NP_416768.4 |
| YP_408985.1 | NP_416769.1 |
| YP_408987.1 | NP_416771.4 |
| YP_408988.1 | NP_416774.2 |
| YP_408992.1 | NP_416775.1 |
| YP_408993.1 | NP_416776.1 |
| YP_408995.1 | NP_416780.1 |
| YP_409000.1 | NP_416781.1 |
| YP_409000.1 | NP_416782.1 |
| YP_409002.1 | NP_416783.1 |
| YP_409003.1 | NP_416784.1 |
| YP_409004.1 | NP_416785.1 |
| YP_409005.1 | NP_416787.1 |
| YP_409010.1 | NP_416788.1 |
| YP_409011.1 | NP_416789.2 |
| YP_409012.1 | NP_416790.1 |
| YP_409014.1 | NP_416791.3 |

|             |             |
|-------------|-------------|
| YP_409025.1 | NP_416792.1 |
| YP_409026.1 | NP_416793.1 |
| YP_409026.1 | NP_416794.1 |
| YP_409027.1 | NP_416796.2 |
| YP_409031.1 | NP_416797.2 |
| YP_409032.1 | NP_416798.1 |
| YP_409036.1 | NP_416799.1 |
| YP_409037.1 | NP_416801.2 |
| YP_409038.1 | NP_416802.1 |
| YP_409039.1 | NP_416803.3 |
| YP_409040.1 | NP_416804.1 |
| YP_409041.1 | NP_416804.1 |
| YP_409042.1 | NP_416805.1 |
| YP_409043.1 | NP_416806.1 |
| YP_409044.1 | NP_416807.1 |
| YP_409048.1 | NP_416809.1 |
| YP_409051.1 | NP_416810.1 |
| YP_409052.1 | NP_416811.1 |
| YP_409053.1 | NP_416812.1 |
| YP_409054.1 | NP_416814.1 |
| YP_409054.1 | NP_416815.1 |
| YP_409055.1 | NP_416816.1 |
| YP_409056.1 | NP_416818.1 |
| YP_409058.1 | NP_416819.1 |
| YP_409065.1 | NP_416820.1 |
| YP_409066.1 | NP_416821.1 |
| YP_409067.1 | NP_416824.1 |
| YP_409069.1 | NP_416825.1 |
| YP_409070.1 | NP_416826.1 |
| YP_409072.2 | NP_416828.1 |
| YP_409075.1 | NP_416829.1 |
| YP_409077.1 | NP_416830.1 |
| YP_409078.1 | NP_416831.1 |
| YP_409079.1 | NP_416832.1 |
| YP_409080.1 | NP_416833.4 |
| YP_409081.1 | NP_416842.1 |
| YP_409085.1 | NP_416843.1 |
| YP_409086.1 | NP_416844.1 |
| YP_409088.1 | NP_416845.2 |
| YP_409097.1 | NP_416848.1 |
| YP_409098.1 | NP_416849.1 |
| YP_409099.2 | NP_416872.4 |
| YP_409100.1 | NP_416873.1 |

|             |             |
|-------------|-------------|
| YP_409103.2 | NP_416874.1 |
| YP_409105.1 | NP_416875.1 |
| YP_409107.1 | NP_416876.1 |
| YP_409122.1 | NP_416877.1 |
| YP_409123.1 | NP_416878.1 |
| YP_409124.1 | NP_416879.4 |
| YP_409125.1 | NP_416882.1 |
| YP_409126.1 | NP_416883.1 |
| YP_409127.1 | NP_416884.1 |
| YP_409128.1 | NP_416886.1 |
| YP_409129.1 | NP_416887.1 |
| YP_409130.1 | NP_416888.1 |
| YP_409131.1 | NP_416889.1 |
| YP_409141.1 | NP_416890.1 |
| YP_409142.1 | NP_416891.1 |
| YP_409143.1 | NP_416894.1 |
| YP_409144.1 | NP_416896.4 |
| YP_409145.1 | NP_416897.2 |
| YP_409146.1 | NP_416899.1 |
| YP_409147.1 | NP_416908.1 |
| YP_409148.1 | NP_416910.1 |
| YP_409149.1 | NP_416912.1 |
| YP_409158.1 | NP_416914.1 |
| YP_409160.1 | NP_416916.1 |
| YP_409161.1 | NP_416919.1 |
| YP_409163.2 | NP_416921.4 |
| YP_409164.2 | NP_416923.1 |
| YP_409165.1 | NP_416925.2 |
| YP_409166.1 | NP_416927.1 |
| YP_409166.1 | NP_416928.4 |
| YP_409167.1 | NP_416929.4 |
| YP_409169.1 | NP_416930.1 |
| YP_409170.1 | NP_416931.1 |
| YP_409171.1 | NP_416931.1 |
| YP_409172.1 | NP_416933.4 |
| YP_409173.1 | NP_416935.1 |
| YP_409174.1 | NP_416936.4 |
| YP_409175.1 | NP_416947.1 |
| YP_409176.1 | NP_416948.4 |
| YP_409177.1 | NP_416949.1 |
| YP_409178.1 | NP_416951.1 |
| YP_409179.1 | NP_416952.2 |
| YP_409180.1 | NP_416955.1 |

|             |             |
|-------------|-------------|
| YP_409181.1 | NP_416956.1 |
| YP_409181.1 | NP_416957.4 |
| YP_409182.1 | NP_416958.1 |
| YP_409185.1 | NP_416961.1 |
| YP_409186.1 | NP_416962.1 |
| YP_409187.1 | NP_416963.1 |
| YP_409188.1 | NP_416964.1 |
| YP_409190.1 | NP_416966.1 |
| YP_409192.1 | NP_416968.2 |
| YP_409193.1 | NP_416970.1 |
| YP_409194.1 | NP_416971.1 |
| YP_409205.1 | NP_416972.4 |
| YP_409211.1 | NP_416972.4 |
| YP_409212.1 | NP_416973.1 |
| YP_409213.1 | NP_416975.1 |
| YP_409214.1 | NP_416988.1 |
| YP_409215.1 | NP_416989.1 |
| YP_409221.1 | NP_416990.1 |
| YP_409225.1 | NP_416991.2 |
| YP_409226.1 | NP_416992.1 |
| YP_409227.1 | NP_416993.2 |
| YP_409228.1 | NP_416994.1 |
| YP_409229.1 | NP_416996.1 |
| YP_409230.1 | NP_416999.1 |
| YP_409232.1 | NP_417000.1 |
| YP_409233.1 | NP_417002.1 |
| YP_409234.1 | NP_417006.2 |
| YP_409235.1 | NP_417007.1 |
| YP_409237.1 | NP_417008.1 |
| YP_409238.1 | NP_417010.1 |
| YP_409239.2 | NP_417012.1 |
| YP_409241.2 | NP_417013.1 |
| YP_409242.1 | NP_417015.1 |
| YP_409243.1 | NP_417016.4 |
| YP_409265.1 | NP_417017.4 |
| YP_409284.1 | NP_417018.4 |
| YP_409307.1 | NP_417019.1 |
| YP_409317.1 | NP_417020.1 |
| YP_409333.1 | NP_417022.1 |
| YP_409334.1 | NP_417023.1 |
| YP_409335.1 | NP_417024.1 |
| YP_409335.1 | NP_417026.1 |
| YP_409337.1 | NP_417028.1 |

|             |             |
|-------------|-------------|
| YP_409338.1 | NP_417029.4 |
| YP_409340.1 | NP_417030.2 |
| YP_409349.1 | NP_417031.1 |
| YP_409349.1 | NP_417044.4 |
| YP_409360.1 | NP_417046.1 |
| YP_409361.1 | NP_417047.1 |
| YP_409369.1 | NP_417048.1 |
| YP_409370.1 | NP_417050.1 |
| YP_409371.2 | NP_417051.2 |
| YP_409372.1 | NP_417051.2 |
| YP_409373.1 | NP_417053.2 |
| YP_409374.1 | NP_417054.2 |
| YP_409375.1 | NP_417055.4 |
| YP_409376.2 | NP_417056.2 |
| YP_409377.1 | NP_417057.1 |
| YP_409379.1 | NP_417058.1 |
| YP_409380.1 | NP_417059.1 |
| YP_409380.1 | NP_417060.1 |
| YP_409381.1 | NP_417061.1 |
| YP_409382.1 | NP_417062.1 |
| YP_409385.1 | NP_417063.1 |
| YP_409386.1 | NP_417065.1 |
| YP_409386.1 | NP_417066.1 |
| YP_409387.1 | NP_417068.1 |
| YP_409388.1 | NP_417069.1 |
| YP_409394.1 | NP_417070.2 |
| YP_409396.1 | NP_417071.1 |
| YP_409397.1 | NP_417073.1 |
| YP_409398.1 | NP_417074.1 |
| YP_409399.1 | NP_417075.1 |
| YP_409399.1 | NP_417076.1 |
| YP_409400.1 | NP_417077.1 |
| YP_409401.1 | NP_417079.1 |
| YP_409402.1 | NP_417080.4 |
| YP_409403.1 | NP_417082.1 |
| YP_409404.1 | NP_417085.1 |
| YP_409405.1 | NP_417086.1 |
| YP_409411.1 | NP_417088.1 |
| YP_409412.1 | NP_417090.1 |
| YP_409413.1 | NP_417092.1 |
| YP_409414.1 | NP_417094.1 |
| YP_409415.1 | NP_417095.1 |
| YP_409416.2 | NP_417096.1 |

|             |             |
|-------------|-------------|
| YP_409417.1 | NP_417097.1 |
| YP_409418.1 | NP_417098.1 |
| YP_409419.1 | NP_417099.4 |
| YP_409420.1 | NP_417100.1 |
| YP_409421.1 | NP_417102.4 |
| YP_409422.1 | NP_417104.1 |
| YP_409422.1 | NP_417105.1 |
| YP_409424.1 | NP_417107.2 |
| YP_409425.1 | NP_417108.4 |
| YP_409426.1 | NP_417109.1 |
| YP_409427.1 | NP_417110.1 |
| YP_409428.1 | NP_417149.1 |
| YP_409429.1 | NP_417152.1 |
| YP_409430.1 | NP_417153.1 |
| YP_409431.1 | NP_417154.1 |
| YP_409432.1 | NP_417155.1 |
| YP_409433.1 | NP_417156.1 |
| YP_409434.1 | NP_417157.1 |
| YP_409435.1 | NP_417158.4 |
| YP_409436.1 | NP_417159.1 |
| YP_409441.1 | NP_417160.1 |
| YP_409442.1 | NP_417161.1 |
| YP_409445.1 | NP_417162.1 |
| YP_409456.1 | NP_417163.1 |
| YP_409465.1 | NP_417167.1 |
| YP_409467.2 | NP_417168.1 |
| YP_409468.1 | NP_417169.1 |
| YP_409469.1 | NP_417172.1 |
| YP_409470.1 | NP_417173.1 |
| YP_409471.2 | NP_417174.1 |
| YP_409472.1 | NP_417175.1 |
| YP_409477.2 | NP_417176.1 |
| YP_409480.1 | NP_417177.1 |
| YP_409481.1 | NP_417178.1 |
| YP_409482.1 | NP_417180.1 |
| YP_409483.1 | NP_417181.1 |
| YP_409484.1 | NP_417184.1 |
| YP_409485.1 | NP_417185.1 |
| YP_409486.1 | NP_417186.1 |
| YP_409488.1 | NP_417187.1 |
| YP_409489.1 | NP_417188.4 |
| YP_409490.1 | NP_417191.1 |
| YP_409491.1 | NP_417193.1 |



|             |             |
|-------------|-------------|
| YP_409491.1 | NP_417197.1 |
| YP_409493.2 | NP_417199.1 |
| YP_409496.1 | NP_417200.1 |
| YP_409497.1 | NP_417201.1 |
| YP_409499.1 | NP_417202.1 |
| YP_409500.1 | NP_417203.1 |
| YP_409500.1 | NP_417203.1 |
| YP_409503.1 | NP_417205.1 |
| YP_409504.1 | NP_417206.1 |
| YP_409505.1 | NP_417208.1 |
| YP_409506.1 | NP_417212.1 |
| YP_409507.1 | NP_417217.1 |
| YP_409508.1 | NP_417223.1 |
| YP_409509.1 | NP_417225.1 |
| YP_409510.1 | NP_417226.1 |
| YP_409511.1 | NP_417227.1 |
| YP_409512.1 | NP_417228.1 |
| YP_409514.1 | NP_417229.1 |
| YP_409515.1 | NP_417230.1 |
| YP_409516.1 | NP_417233.1 |
| YP_409517.1 | NP_417242.1 |
| YP_409518.1 | NP_417244.1 |
| YP_409519.1 | NP_417245.1 |
| YP_409520.1 | NP_417257.1 |
| YP_409521.1 | NP_417260.1 |
| YP_409522.1 | NP_417261.1 |
| YP_409531.1 | NP_417264.1 |
| YP_409532.2 | NP_417266.1 |
| YP_409534.1 | NP_417267.1 |
| YP_409537.2 | NP_417268.1 |
| YP_409538.1 | NP_417270.1 |
| YP_409539.1 | NP_417271.1 |
| YP_409540.1 | NP_417272.1 |
| YP_409541.1 | NP_417273.1 |
| YP_409542.1 | NP_417273.1 |
| YP_409543.1 | NP_417274.1 |
| YP_409544.1 | NP_417275.1 |
| YP_409546.1 | NP_417276.1 |
| YP_409547.1 | NP_417277.1 |
| YP_409548.1 | NP_417278.4 |
| YP_409549.1 | NP_417279.2 |
| YP_409550.1 | NP_417282.1 |
| YP_409551.1 | NP_417283.1 |

|             |             |
|-------------|-------------|
| YP_409552.1 | NP_417284.1 |
| YP_409553.1 | NP_417285.1 |
| YP_409554.1 | NP_417286.1 |
| YP_409555.1 | NP_417287.1 |
| YP_409557.1 | NP_417289.2 |
| YP_409557.1 | NP_417290.1 |
| YP_409558.1 | NP_417291.1 |
| YP_409559.1 | NP_417292.1 |
| YP_409561.1 | NP_417294.4 |
| YP_409575.1 | NP_417295.1 |
| YP_409577.1 | NP_417296.1 |
| YP_409578.1 | NP_417298.1 |
| YP_409579.1 | NP_417300.1 |
| YP_409589.1 | NP_417302.1 |
| YP_409590.1 | NP_417304.1 |
| YP_409591.1 | NP_417305.1 |
| YP_409592.1 | NP_417306.1 |
| YP_409593.1 | NP_417307.1 |
| YP_409594.1 | NP_417308.1 |
| YP_409595.1 | NP_417309.1 |
| YP_409596.1 | NP_417310.1 |
| YP_409597.1 | NP_417311.1 |
| YP_409598.1 | NP_417312.1 |
| YP_409599.1 | NP_417313.1 |
| YP_409604.1 | NP_417314.1 |
| YP_409605.1 | NP_417315.1 |
| YP_409606.1 | NP_417316.1 |
| YP_409607.1 | NP_417318.1 |
| YP_409608.1 | NP_417319.1 |
| YP_409609.1 | NP_417320.1 |
| YP_409610.1 | NP_417321.2 |
| YP_409611.1 | NP_417322.1 |
| YP_409612.1 | NP_417358.2 |
| YP_409613.1 | NP_417359.1 |
| YP_409614.1 | NP_417362.4 |
| YP_409615.1 | NP_417363.2 |
| YP_409616.1 | NP_417365.1 |
| YP_409617.1 | NP_417366.1 |
| YP_409618.1 | NP_417367.1 |
| YP_409619.1 | NP_417369.1 |
| YP_409620.1 | NP_417371.1 |
| YP_409621.1 | NP_417372.1 |
| YP_409622.1 | NP_417373.1 |

|             |             |
|-------------|-------------|
| YP_409623.1 | NP_417374.1 |
| YP_409627.1 | NP_417375.1 |
| YP_409628.1 | NP_417376.1 |
| YP_409629.1 | NP_417377.1 |
| YP_409630.1 | NP_417379.1 |
| YP_409637.1 | NP_417380.1 |
| YP_409638.1 | NP_417382.1 |
| YP_409639.1 | NP_417383.1 |
| YP_409640.1 | NP_417384.1 |
| YP_409641.1 | NP_417385.4 |
| YP_409643.1 | NP_417386.1 |
| YP_409644.1 | NP_417387.3 |
| YP_409647.1 | NP_417388.1 |
| YP_409647.1 | NP_417389.1 |
| YP_409648.1 | NP_417391.1 |
| YP_409649.1 | NP_417397.1 |
| YP_409650.1 | NP_417398.1 |
| YP_409653.1 | NP_417399.1 |
| YP_409653.1 | NP_417400.1 |
| YP_409655.1 | NP_417401.1 |
| YP_409656.1 | NP_417402.1 |
| YP_409657.1 | NP_417402.1 |
| YP_409658.1 | NP_417404.1 |
| YP_409659.1 | NP_417409.1 |
| YP_409660.1 | NP_417411.2 |
| YP_409661.1 | NP_417413.1 |
| YP_409662.1 | NP_417417.1 |
| YP_409662.1 | NP_417419.1 |
| YP_409663.1 | NP_417421.4 |
| YP_409664.1 | NP_417423.4 |
| YP_409665.1 | NP_417424.1 |
| YP_409666.1 | NP_417426.1 |
| YP_409674.1 | NP_417428.2 |
| YP_409677.1 | NP_417429.1 |
| YP_409681.1 | NP_417430.1 |
| YP_409682.1 | NP_417462.1 |
| YP_409684.1 | NP_417463.4 |
| YP_409685.1 | NP_417464.1 |
| YP_409686.1 | NP_417467.1 |
| YP_409687.1 | NP_417468.1 |
| YP_409688.1 | NP_417469.1 |
| YP_409689.1 | NP_417470.1 |
| YP_409692.1 | NP_417471.1 |

|             |             |
|-------------|-------------|
| YP_409693.1 | NP_417472.1 |
| YP_409694.1 | NP_417474.1 |
| YP_409695.1 | NP_417475.1 |
| YP_409696.1 | NP_417476.1 |
| YP_409697.1 | NP_417478.1 |
| YP_409698.2 | NP_417479.1 |
| YP_409699.1 | NP_417482.1 |
| YP_409701.1 | NP_417483.2 |
| YP_409702.1 | NP_417484.1 |
| YP_409703.2 | NP_417485.4 |
| YP_409704.1 | NP_417487.1 |
| YP_409704.1 | NP_417489.1 |
| YP_409707.1 | NP_417490.1 |
| YP_409708.1 | NP_417491.1 |
| YP_409709.1 | NP_417496.1 |
| YP_409712.1 | NP_417497.1 |
| YP_409714.1 | NP_417498.1 |
| YP_409715.1 | NP_417501.1 |
| YP_409718.1 | NP_417503.1 |
| YP_409719.1 | NP_417504.1 |
| YP_409720.1 | NP_417505.1 |
| YP_409726.1 | NP_417506.1 |
| YP_409727.1 | NP_417507.2 |
| YP_409728.1 | NP_417509.3 |
| YP_409729.1 | NP_417510.1 |
| YP_409741.1 | NP_417511.2 |
| YP_409742.1 | NP_417512.1 |
| YP_409743.1 | NP_417513.1 |
| YP_409744.1 | NP_417521.1 |
| YP_409745.1 | NP_417522.1 |
| YP_409746.1 | NP_417527.1 |
| YP_409747.1 | NP_417528.1 |
| YP_409748.1 | NP_417529.1 |
| YP_409749.2 | NP_417530.2 |
| YP_409750.1 | NP_417531.1 |
| YP_409751.1 | NP_417536.1 |
| YP_409752.1 | NP_417537.1 |
| YP_409769.1 | NP_417538.1 |
| YP_409771.1 | NP_417539.1 |
| YP_409772.1 | NP_417540.1 |
| YP_409773.1 | NP_417541.1 |
| YP_409776.1 | NP_417545.1 |
| YP_409777.1 | NP_417546.1 |

|             |             |
|-------------|-------------|
| YP_409778.1 | NP_417583.4 |
| YP_409779.1 | NP_417586.1 |
| YP_409780.1 | NP_417587.1 |
| YP_409781.1 | NP_417593.4 |
| YP_409782.2 | NP_417593.4 |
| YP_409783.2 | NP_417594.3 |
| YP_409784.1 | NP_417595.1 |
| YP_409785.1 | NP_417596.1 |
| YP_409786.1 | NP_417597.1 |
| YP_409787.1 | NP_417618.1 |
| YP_409789.1 | NP_417619.1 |
| YP_409790.1 | NP_417621.2 |
| YP_409791.1 | NP_417623.1 |
| YP_409803.1 | NP_417625.1 |
| YP_409804.1 | NP_417626.1 |
| YP_409805.1 | NP_417627.1 |
| YP_409806.1 | NP_417628.2 |
| YP_409807.1 | NP_417629.1 |
| YP_409807.1 | NP_417631.2 |
| YP_409808.1 | NP_417632.1 |
| YP_409809.1 | NP_417633.4 |
| YP_409810.1 | NP_417634.1 |
| YP_409818.1 | NP_417635.1 |
| YP_409819.1 | NP_417636.1 |
| YP_409820.1 | NP_417637.1 |
| YP_409821.1 | NP_417638.1 |
| YP_409822.1 | NP_417639.6 |
| YP_409824.1 | NP_417640.1 |
| YP_409830.1 | NP_417642.1 |
| YP_409832.1 | NP_417644.4 |
| YP_409833.1 | NP_417645.1 |
| YP_409835.1 | NP_417646.1 |
| YP_409840.1 | NP_417647.1 |
| YP_409844.2 | NP_417650.1 |
| YP_409849.1 | NP_417652.1 |
| YP_409851.1 | NP_417654.1 |
| YP_409852.1 | NP_417655.1 |
| YP_409853.1 | NP_417656.1 |
| YP_409854.1 | NP_417657.2 |
| YP_409859.1 | NP_417658.4 |
| YP_409860.1 | NP_417659.1 |
| YP_409861.1 | NP_417660.1 |
| YP_409862.1 | NP_417662.1 |

|             |             |
|-------------|-------------|
| YP_409865.2 | NP_417663.1 |
| YP_409866.1 | NP_417665.1 |
| YP_409867.1 | NP_417666.1 |
| YP_409868.1 | NP_417667.1 |
| YP_409874.1 | NP_417668.1 |
| YP_409875.1 | NP_417669.1 |
| YP_409876.1 | NP_417670.1 |
| YP_409876.1 | NP_417671.1 |
| YP_409885.1 | NP_417672.1 |
| YP_409893.1 | NP_417673.1 |
| YP_409898.1 | NP_417674.1 |
| YP_409900.1 | NP_417675.1 |
| YP_409901.1 | NP_417676.2 |
| YP_409902.1 | NP_417679.2 |
| YP_409917.1 | NP_417680.1 |
| YP_409918.1 | NP_417688.1 |
| YP_409919.1 | NP_417690.1 |
| YP_409921.1 | NP_417691.4 |
| YP_409923.1 | NP_417692.1 |
| YP_409924.1 | NP_417693.3 |
| YP_409925.1 | NP_417695.1 |
| YP_409926.1 | NP_417697.1 |
| YP_409927.1 | NP_417698.1 |
| YP_409928.1 | NP_417700.2 |
| YP_409929.1 | NP_417701.1 |
| YP_409932.1 | NP_417702.1 |
| YP_409933.1 | NP_417704.1 |
| YP_409934.1 | NP_417705.2 |
| YP_409940.1 | NP_417706.1 |
| YP_409940.1 | NP_417708.1 |
| YP_409941.1 | NP_417709.2 |
| YP_409942.1 | NP_417710.1 |
| YP_409943.1 | NP_417713.2 |
| YP_409944.1 | NP_417714.1 |
| YP_409945.1 | NP_417715.1 |
| YP_409946.1 | NP_417716.1 |
| YP_409947.1 | NP_417717.2 |
| YP_409949.2 | NP_417718.1 |
| YP_409950.1 | NP_417721.1 |
| YP_409951.2 | NP_417723.1 |
| YP_409953.1 | NP_417725.1 |
| YP_409954.1 | NP_417726.1 |
| YP_409961.1 | NP_417727.1 |

|             |             |
|-------------|-------------|
| YP_409963.1 | NP_417728.4 |
| YP_409965.1 | NP_417729.1 |
| YP_409983.1 | NP_417739.1 |
| YP_409984.1 | NP_417740.1 |
| YP_409985.1 | NP_417741.1 |
| YP_410023.1 | NP_417743.1 |
| YP_410024.1 | NP_417746.1 |
| YP_410025.1 | NP_417747.1 |
| YP_410026.1 | NP_417748.1 |
| YP_410027.1 | NP_417749.1 |
| YP_410028.1 | NP_417751.1 |
| YP_410029.1 | NP_417752.1 |
| YP_410030.1 | NP_417754.1 |
| YP_410033.1 | NP_417755.1 |
| YP_410043.1 | NP_417756.1 |
| YP_410044.1 | NP_417757.1 |
| YP_410045.1 | NP_417758.1 |
| YP_410046.1 | NP_417759.1 |
| YP_410047.1 | NP_417760.1 |
| YP_410048.1 | NP_417761.1 |
| YP_410049.1 | NP_417762.1 |
| YP_410050.1 | NP_417763.1 |
| YP_410051.1 | NP_417764.1 |
| YP_410052.1 | NP_417765.1 |
| YP_410053.1 | NP_417766.1 |
| YP_410054.1 | NP_417767.1 |
| YP_410055.1 | NP_417768.1 |
| YP_410056.1 | NP_417769.1 |
| YP_410057.1 | NP_417770.1 |
| YP_410063.1 | NP_417771.1 |
| YP_410064.1 | NP_417772.1 |
| YP_410065.1 | NP_417774.1 |
| YP_410066.1 | NP_417775.1 |
| YP_410067.1 | NP_417776.1 |
| YP_410070.1 | NP_417777.1 |
| YP_410071.1 | NP_417778.1 |
| YP_410072.1 | NP_417800.1 |
| YP_410073.1 | NP_417801.1 |
| YP_410074.1 | NP_417807.1 |
| YP_410075.1 | NP_417809.1 |
| YP_410076.1 | NP_417811.1 |
| YP_410080.1 | NP_417813.1 |
| YP_410081.1 | NP_417814.1 |

|             |             |
|-------------|-------------|
| YP_410082.1 | NP_417815.1 |
| YP_410084.1 | NP_417816.1 |
| YP_410085.1 | NP_417817.2 |
| YP_410086.1 | NP_417818.1 |
| YP_410087.1 | NP_417819.1 |
| YP_410088.1 | NP_417821.1 |
| YP_410089.1 | NP_417822.1 |
| YP_410090.1 | NP_417823.1 |
| YP_410091.1 | NP_417824.1 |
| YP_410092.1 | NP_417825.1 |
| YP_410093.1 | NP_417828.1 |
| YP_410094.1 | NP_417829.2 |
| YP_410095.1 | NP_417843.1 |
| YP_410096.1 | NP_417844.1 |
| YP_410097.1 | NP_417845.1 |
| YP_410100.1 | NP_417846.1 |
| YP_410101.1 | NP_417848.1 |
| YP_410102.1 | NP_417850.1 |
| YP_410103.1 | NP_417851.4 |
| YP_410104.1 | NP_417852.1 |
| YP_410105.1 | NP_417853.1 |
| YP_410107.2 | NP_417856.1 |
| YP_410108.1 | NP_417857.1 |
| YP_410109.1 | NP_417858.4 |
| YP_410110.1 | NP_417859.1 |
| YP_410111.1 | NP_417860.2 |
| YP_410115.1 | NP_417860.2 |
| YP_410118.2 | NP_417861.1 |
| YP_410119.1 | NP_417862.1 |
| YP_410124.1 | NP_417864.1 |
| YP_410125.1 | NP_417869.1 |
| YP_410126.1 | NP_417872.2 |
| YP_410127.1 | NP_417873.1 |
| YP_410130.1 | NP_417875.1 |
| YP_410131.1 | NP_417879.1 |
| YP_410132.1 | NP_417883.1 |
| YP_410133.1 | NP_417886.1 |
| YP_410134.1 | NP_417887.1 |
| YP_410135.1 | NP_417888.1 |
| YP_410136.1 | NP_417889.1 |
| YP_410137.2 | NP_417891.1 |
| YP_410138.1 | NP_417892.1 |
| YP_410141.1 | NP_417894.2 |



|             |             |
|-------------|-------------|
| YP_410144.1 | NP_417897.1 |
| YP_410145.1 | NP_417897.1 |
| YP_410147.1 | NP_417904.1 |
| YP_410149.1 | NP_417905.1 |
| YP_410150.1 | NP_417906.1 |
| YP_410151.1 | NP_417908.1 |
| YP_410152.1 | NP_417911.4 |
| YP_410154.1 | NP_417912.1 |
| YP_410155.1 | NP_417913.1 |
| YP_410157.1 | NP_417916.1 |
| YP_410158.2 | NP_417918.1 |
| YP_410159.1 | NP_417920.1 |
| YP_410160.1 | NP_417922.1 |
| YP_410163.1 | NP_417923.1 |
| YP_410184.1 | NP_417924.1 |
| YP_410185.1 | NP_417927.1 |
| YP_410186.1 | NP_417928.1 |
| YP_410187.1 | NP_417929.4 |
| YP_410188.1 | NP_417931.4 |
| YP_410198.1 | NP_417932.1 |
| YP_410203.1 | NP_417932.1 |
| YP_410203.1 | NP_417933.1 |
| YP_410204.1 | NP_417934.1 |
| YP_410207.2 | NP_417935.1 |
| YP_410208.1 | NP_417936.1 |
| YP_410209.1 | NP_417938.1 |
| YP_410211.1 | NP_417944.1 |
| YP_410211.1 | NP_417949.1 |
| YP_410212.1 | NP_417950.1 |
| YP_410213.1 | NP_417951.1 |
| YP_410215.1 | NP_417952.1 |
| YP_410216.1 | NP_417953.1 |
| YP_410219.1 | NP_417955.1 |
| YP_410220.1 | NP_417955.1 |
| YP_410221.1 | NP_417960.1 |
| YP_410223.1 | NP_417976.1 |
| YP_410224.1 | NP_417977.1 |
| YP_410225.1 | NP_417978.2 |
| YP_410226.1 | NP_417979.1 |
| YP_410227.1 | NP_417980.1 |
| YP_410228.1 | NP_417981.2 |
| YP_410230.1 | NP_417982.2 |
| YP_410231.1 | NP_417983.2 |

|             |             |
|-------------|-------------|
| YP_410231.1 | NP_417984.1 |
| YP_410232.1 | NP_417985.1 |
| YP_410236.1 | NP_417986.4 |
| YP_410237.1 | NP_417998.1 |
| YP_410238.1 | NP_418001.1 |
| YP_410239.1 | NP_418002.2 |
| YP_410240.1 | NP_418004.4 |
| YP_410242.1 | NP_418005.1 |
| YP_410244.2 | NP_418006.1 |
| YP_410245.1 | NP_418007.3 |
| YP_410245.1 | NP_418009.2 |
| YP_410246.1 | NP_418010.2 |
| YP_410246.1 | NP_418011.1 |
| YP_410248.1 | NP_418012.1 |
| YP_410250.1 | NP_418017.1 |
| YP_410251.1 | NP_418018.1 |
| YP_410253.1 | NP_418021.1 |
| YP_410254.1 | NP_418022.1 |
| YP_410255.1 | NP_418023.1 |
| YP_410256.1 | NP_418024.1 |
| YP_410257.2 | NP_418025.1 |
| YP_410258.1 | NP_418026.1 |
| YP_410259.1 | NP_418028.1 |
| YP_410260.2 | NP_418045.4 |
| YP_410261.1 | NP_418048.1 |
| YP_410261.1 | NP_418049.1 |
| YP_410264.2 | NP_418055.1 |
| YP_410272.1 | NP_418057.1 |
| YP_410273.1 | NP_418059.1 |
| YP_410274.1 | NP_418060.1 |
| YP_410275.1 | NP_418061.1 |
| YP_410276.1 | NP_418062.1 |
| YP_410277.1 | NP_418063.1 |
| YP_410279.1 | NP_418066.1 |
| YP_410280.2 | NP_418067.1 |
| YP_410281.1 | NP_418068.1 |
| YP_410282.1 | NP_418069.1 |
| YP_410283.1 | NP_418072.1 |
| YP_410284.1 | NP_418074.1 |
| YP_410285.1 | NP_418076.1 |
| YP_410286.1 | NP_418077.1 |
| YP_410287.2 | NP_418090.1 |
| YP_410288.1 | NP_418091.1 |

|             |             |
|-------------|-------------|
| YP_410289.1 | NP_418092.1 |
| YP_410290.1 | NP_418093.1 |
| YP_410291.2 | NP_418094.1 |
| YP_410293.1 | NP_418096.4 |
| YP_410307.1 | NP_418097.1 |
| YP_410314.1 | NP_418098.4 |
| YP_410315.1 | NP_418099.1 |
| YP_410316.1 | NP_418103.4 |
| YP_410317.1 | NP_418104.2 |
| YP_410324.1 | NP_418105.1 |
| YP_410325.1 | NP_418106.1 |
| YP_410326.1 | NP_418108.1 |
| YP_410328.2 | NP_418110.1 |
| YP_410329.1 | NP_418111.1 |
| YP_410332.2 | NP_418112.1 |
| YP_410333.1 | NP_418113.1 |
| YP_410335.1 | NP_418114.4 |
| YP_410336.1 | NP_418119.2 |
| YP_410338.1 | NP_418120.2 |
| YP_410339.2 | NP_418120.2 |
| YP_410346.1 | NP_418122.1 |
| YP_410350.1 | NP_418123.2 |
| YP_410368.1 | NP_418125.1 |
| YP_410386.1 | NP_418126.1 |
| YP_410399.1 | NP_418127.1 |
| YP_410429.1 | NP_418127.1 |
| YP_410431.1 | NP_418128.1 |
| YP_410432.1 | NP_418131.1 |
| YP_410433.1 | NP_418145.2 |
| YP_410434.1 | NP_418152.1 |
| YP_410435.1 | NP_418153.4 |
| YP_410436.1 | NP_418155.1 |
| YP_410442.1 | NP_418158.1 |
| YP_410443.1 | NP_418159.1 |
| YP_410450.1 | NP_418161.1 |
| YP_410453.1 | NP_418166.1 |
| YP_410454.1 | NP_418167.1 |
| YP_410455.1 | NP_418180.1 |
| YP_410456.1 | NP_418181.1 |
| YP_410457.1 | NP_418182.1 |
| YP_410458.1 | NP_418183.1 |
| YP_410459.1 | NP_418184.1 |
| YP_410460.1 | NP_418185.1 |

|             |             |
|-------------|-------------|
| YP_410461.1 | NP_418186.1 |
| YP_410462.1 | NP_418187.1 |
| YP_410463.1 | NP_418189.1 |
| YP_410464.1 | NP_418190.1 |
| YP_410465.1 | NP_418191.1 |
| YP_410466.1 | NP_418192.1 |
| YP_410467.1 | NP_418193.1 |
| YP_410468.1 | NP_418194.1 |
| YP_410471.1 | NP_418195.2 |
| YP_410472.1 | NP_418197.1 |
| YP_410474.1 | NP_418198.1 |
| YP_410477.1 | NP_418199.1 |
| YP_410478.1 | NP_418200.1 |
| YP_410479.1 | NP_418204.2 |
| YP_410480.1 | NP_418205.1 |
| YP_410481.1 | NP_418206.1 |
| YP_410482.1 | NP_418207.1 |
| YP_410484.1 | NP_418210.1 |
| YP_410485.1 | NP_418213.1 |
| YP_410486.1 | NP_418217.1 |
| YP_410487.1 | NP_418222.1 |
| YP_410488.1 | NP_418227.1 |
| YP_410502.1 | NP_418228.2 |
| YP_410503.1 | NP_418230.1 |
| YP_410504.1 | NP_418231.1 |
| YP_410505.1 | NP_418232.2 |
| YP_410506.1 | NP_418236.1 |
| YP_410508.1 | NP_418241.1 |
| YP_410511.1 | NP_418242.1 |
| YP_410512.2 | NP_418246.1 |
| YP_410513.1 | NP_418247.1 |
| YP_410514.1 | NP_418248.1 |
| YP_410515.1 | NP_418250.1 |
| YP_410516.2 | NP_418250.1 |
| YP_410517.1 | NP_418251.1 |
| YP_410526.1 | NP_418254.2 |
| YP_410527.2 | NP_418255.1 |
| YP_410528.1 | NP_418256.1 |
| YP_410529.1 | NP_418257.1 |
| YP_410530.1 | NP_418258.1 |
| YP_410531.1 | NP_418264.4 |
| YP_410532.1 | NP_418265.1 |
| YP_410533.1 | NP_418271.1 |

|             |             |
|-------------|-------------|
| YP_410534.1 | NP_418272.1 |
| YP_410535.1 | NP_418275.1 |
| YP_410536.1 | NP_418276.1 |
| YP_410536.1 | NP_418278.1 |
| YP_410537.1 | NP_418279.1 |
| YP_410538.1 | NP_418280.4 |
| YP_410540.1 | NP_418282.1 |
| YP_410541.2 | NP_418284.1 |
| YP_410543.1 | NP_418288.1 |
| YP_410546.2 | NP_418288.1 |
| YP_410547.1 | NP_418289.1 |
| YP_410547.1 | NP_418290.4 |
| YP_410547.1 | NP_418292.1 |
| YP_410548.1 | NP_418293.2 |
| YP_410549.1 | NP_418294.1 |
| YP_410550.1 | NP_418295.1 |
| YP_410551.1 | NP_418296.1 |
| YP_410552.1 | NP_418297.1 |
| YP_410554.1 | NP_418300.1 |
| YP_410555.1 | NP_418301.3 |
| YP_410557.1 | NP_418302.1 |
| YP_410558.1 | NP_418304.1 |
| YP_410559.1 | NP_418305.1 |
| YP_410578.2 | NP_418306.1 |
| YP_410595.1 | NP_418320.2 |
| YP_410595.1 | NP_418321.4 |
| YP_410595.1 | NP_418322.1 |
| YP_410596.1 | NP_418323.1 |
| YP_410609.1 | NP_418327.1 |
| YP_410642.1 | NP_418328.1 |
| YP_410643.1 | NP_418329.1 |
| YP_410644.1 | NP_418330.1 |
| YP_410659.2 | NP_418331.1 |
| YP_410660.1 | NP_418337.1 |
| YP_410661.1 | NP_418340.1 |
| YP_410662.1 | NP_418342.2 |
| YP_410663.2 | NP_418343.1 |
| YP_410666.1 | NP_418344.3 |
| YP_410667.1 | NP_418346.2 |
| YP_410668.1 | NP_418347.1 |
| YP_410669.1 | NP_418348.1 |
| YP_410670.1 | NP_418350.1 |
| YP_410671.1 | NP_418350.1 |

|                  |             |
|------------------|-------------|
| YP_410672.1      | NP_418352.1 |
| YP_410674.1      | NP_418354.1 |
| YP_410675.1      | NP_418355.1 |
| YP_410677.1      | NP_418356.1 |
| YP_410678.1      | NP_418357.1 |
| YP_410679.1      | NP_418358.1 |
| YP_410680.1      | NP_418359.1 |
| YP_410681.1      | NP_418362.1 |
| YP_410684.1      | NP_418363.1 |
| YP_410684.1      | NP_418364.1 |
| YP_410686.1      | NP_418365.1 |
| YP_410688.2      | NP_418366.1 |
| YP_410689.1      | NP_418367.1 |
| YP_410690.2      | NP_418369.1 |
| YP_410691.1      | NP_418370.1 |
| YP_410692.2      | NP_418371.1 |
| YP_410693.1      | NP_418372.1 |
| YP_410694.1      | NP_418373.1 |
| YP_410695.1      | NP_418374.1 |
| YP_410696.1      | NP_418375.1 |
| YP_410697.1      | NP_418376.1 |
| YP_410697.1      | NP_418377.1 |
| YP_410698.1      | NP_418378.4 |
| YP_410701.1      | NP_418379.1 |
| WP_032157082     | NP_418381.1 |
| WP_012601368     | NP_418385.1 |
| WP_000274308     | NP_418386.1 |
| WP_032174515     | NP_418387.3 |
| HMPREF9551_04418 | NP_418388.1 |
| WP_005010137     | NP_418389.1 |
| WP_032159437     | NP_418390.1 |
| WP_005137885     | NP_418392.1 |
| WP_000252902     | NP_418393.1 |
| SB521682_1666    | NP_418394.3 |
| Asd1617_03882    | NP_418395.1 |
|                  | NP_418396.1 |
|                  | NP_418398.2 |
|                  | NP_418399.1 |
|                  | NP_418400.1 |
|                  | NP_418403.1 |
|                  | NP_418404.1 |
|                  | NP_418405.1 |
|                  | NP_418436.1 |

NP\_418437.1  
NP\_418438.1  
NP\_418440.1  
NP\_418442.2  
NP\_418444.1  
NP\_418445.1  
NP\_418448.1  
NP\_418449.1  
NP\_418452.1  
NP\_418453.1  
NP\_418454.1  
NP\_418457.1  
NP\_418458.1  
NP\_418459.1  
NP\_418460.1  
NP\_418463.4  
NP\_418464.1  
NP\_418466.1  
NP\_418468.3  
NP\_418469.1  
NP\_418470.4  
NP\_418473.3  
NP\_418474.4  
NP\_418475.1  
NP\_418476.1  
NP\_418477.1  
NP\_418479.1  
NP\_418480.1  
NP\_418482.1  
NP\_418484.4  
NP\_418485.1  
NP\_418486.1  
NP\_418487.1  
NP\_418488.1  
NP\_418492.1  
NP\_418493.1  
NP\_418494.1  
NP\_418495.2  
NP\_418499.1  
NP\_418500.1  
NP\_418501.1  
NP\_418502.1  
NP\_418503.1

NP\_418503.1  
NP\_418504.1  
NP\_418504.1  
NP\_418505.2  
NP\_418518.1  
NP\_418520.1  
NP\_418529.1  
NP\_418531.1  
NP\_418532.1  
NP\_418535.1  
NP\_418537.1  
NP\_418538.2  
NP\_418540.1  
NP\_418541.2  
NP\_418542.1  
NP\_418543.1  
NP\_418545.1  
NP\_418546.1  
NP\_418547.1  
NP\_418548.1  
NP\_418549.1  
NP\_418550.1  
NP\_418559.1  
NP\_418560.1  
NP\_418562.4  
NP\_418564.2  
NP\_418565.1  
NP\_418566.1  
NP\_418568.2  
NP\_418569.1  
NP\_418570.1  
NP\_418571.1  
NP\_418572.4  
NP\_418573.1  
NP\_418574.1  
NP\_418575.1  
NP\_418576.1  
NP\_418577.1  
NP\_418578.1  
NP\_418578.1  
NP\_418579.2  
NP\_418583.1  
NP\_418584.1



NP\_418585.4  
NP\_418587.1  
NP\_418589.1  
NP\_418591.1  
NP\_418592.1  
NP\_418593.1  
NP\_418594.1  
NP\_418595.1  
NP\_418596.1  
NP\_418597.1  
NP\_418598.1  
NP\_418599.1  
NP\_418600.4  
NP\_418601.1  
NP\_418602.1  
NP\_418606.1  
NP\_418607.1  
NP\_418631.2  
NP\_418635.1  
NP\_418637.1  
NP\_418638.2  
NP\_418640.1  
NP\_418641.1  
NP\_418643.1  
NP\_418647.1  
NP\_418648.1  
NP\_418651.3  
NP\_418652.2  
NP\_418653.1  
NP\_418654.1  
NP\_418655.1  
NP\_418658.1  
NP\_418659.1  
NP\_418659.1  
NP\_418660.1  
NP\_418661.1  
NP\_418662.1  
NP\_418664.2  
NP\_418665.1  
NP\_418666.1  
NP\_418676.1  
NP\_418679.1  
NP\_418680.1

NP\_418682.1  
NP\_418683.4  
NP\_418742.1  
NP\_418744.1  
NP\_418747.1  
NP\_418748.1  
NP\_418749.1  
NP\_418750.2  
NP\_418754.2  
NP\_418755.4  
NP\_418772.4  
NP\_418773.1  
NP\_418780.2  
NP\_418781.1  
NP\_418782.1  
NP\_418789.1  
NP\_418790.1  
NP\_418791.1  
NP\_418793.1  
NP\_418794.1  
NP\_418796.1  
NP\_418797.1  
NP\_418798.1  
NP\_418799.1  
NP\_418801.1  
NP\_418803.1  
NP\_418804.1  
NP\_418805.1  
NP\_418806.1  
NP\_418807.4  
NP\_418808.1  
NP\_418809.4  
NP\_418810.1  
NP\_418811.2  
NP\_418812.1  
NP\_418813.1  
NP\_418814.1  
NP\_418815.1  
NP\_418816.1  
NP\_418818.1  
YP\_001165313.1  
YP\_001165316.1  
YP\_001165317.1

YP\_001165318.1  
YP\_001165319.1  
YP\_001165321.1  
YP\_001165321.1  
YP\_001165325.1  
YP\_002791237.1  
YP\_002791254.1  
YP\_002791260.1  
YP\_004831120.1  
YP\_009029994.1  
YP\_009029995.1  
YP\_025294.2  
YP\_025300.1  
YP\_025302.1  
YP\_025304.1  
YP\_025305.1  
YP\_025309.2  
YP\_026160.1  
YP\_026161.1  
YP\_026162.2  
YP\_026168.2  
YP\_026169.1  
YP\_026172.1  
YP\_026180.1  
YP\_026181.1  
YP\_026195.1  
YP\_026199.1  
YP\_026205.1  
YP\_026207.1  
YP\_026208.1  
YP\_026210.1  
YP\_026212.2  
YP\_026215.2  
YP\_026216.2  
YP\_026218.1  
YP\_026220.1  
YP\_026221.1  
YP\_026222.1  
YP\_026223.1  
YP\_026226.4  
YP\_026228.1  
YP\_026230.1  
YP\_026231.1

YP\_026241.1  
YP\_026244.1  
YP\_026245.1  
YP\_026246.1  
YP\_026247.1  
YP\_026248.1  
YP\_026252.1  
YP\_026253.1  
YP\_026254.1  
YP\_026255.1  
YP\_026256.2  
YP\_026257.1  
YP\_026258.1  
YP\_026260.1  
YP\_026263.3  
YP\_026264.1  
YP\_026265.1  
YP\_026267.1  
YP\_026268.1  
YP\_026269.1  
YP\_026270.1  
YP\_026271.1  
YP\_026272.1  
YP\_026274.1  
YP\_026277.1  
YP\_026278.1  
YP\_026283.1  
YP\_026284.1  
YP\_026291.2  
YP\_588441.1  
YP\_588442.1  
YP\_588446.1  
YP\_588449.2  
YP\_588450.2  
YP\_588453.1  
YP\_588455.2  
YP\_588460.1  
YP\_588461.1  
YP\_588462.1  
YP\_588465.1  
YP\_588467.1  
YP\_588468.1  
YP\_588470.1

YP\_588473.1  
WP\_012601368  
WP\_032345299  
G995\_01251  
WP\_001305769  
WP\_001305263  
ESSG\_02710  
A1YU\_00345  
WP\_001442439
