# Supplementary material
Source: PubMed Central journal article supplement (PMC4390639)
Supplement: JCM.03527-14_zjm999094109so2.pdf [file JCM.03527-14_zjm999094109so2.pdf]

1 **Supplemental Figure Legends**

2 **Supplemental Figure 1.** A whole genome phylogeny of 164 *Shigella* genomes. The  
3 tree was inferred with FastTree2 (2) on a Mugsy (1) whole-genome alignment. Labels at  
4 branch nodes indicate the clade naming convention developed in this study. This  
5 phylogeny illustrates the placement of 96 *S. flexneri* genomes, assembled from raw read  
6 data in the Sequence Read Archive (<http://www.ncbi.nlm.nih.gov/sra>), compared to the  
7 69 *Shigella* genomes shown in Figure 3.

8 Figure S1.

9

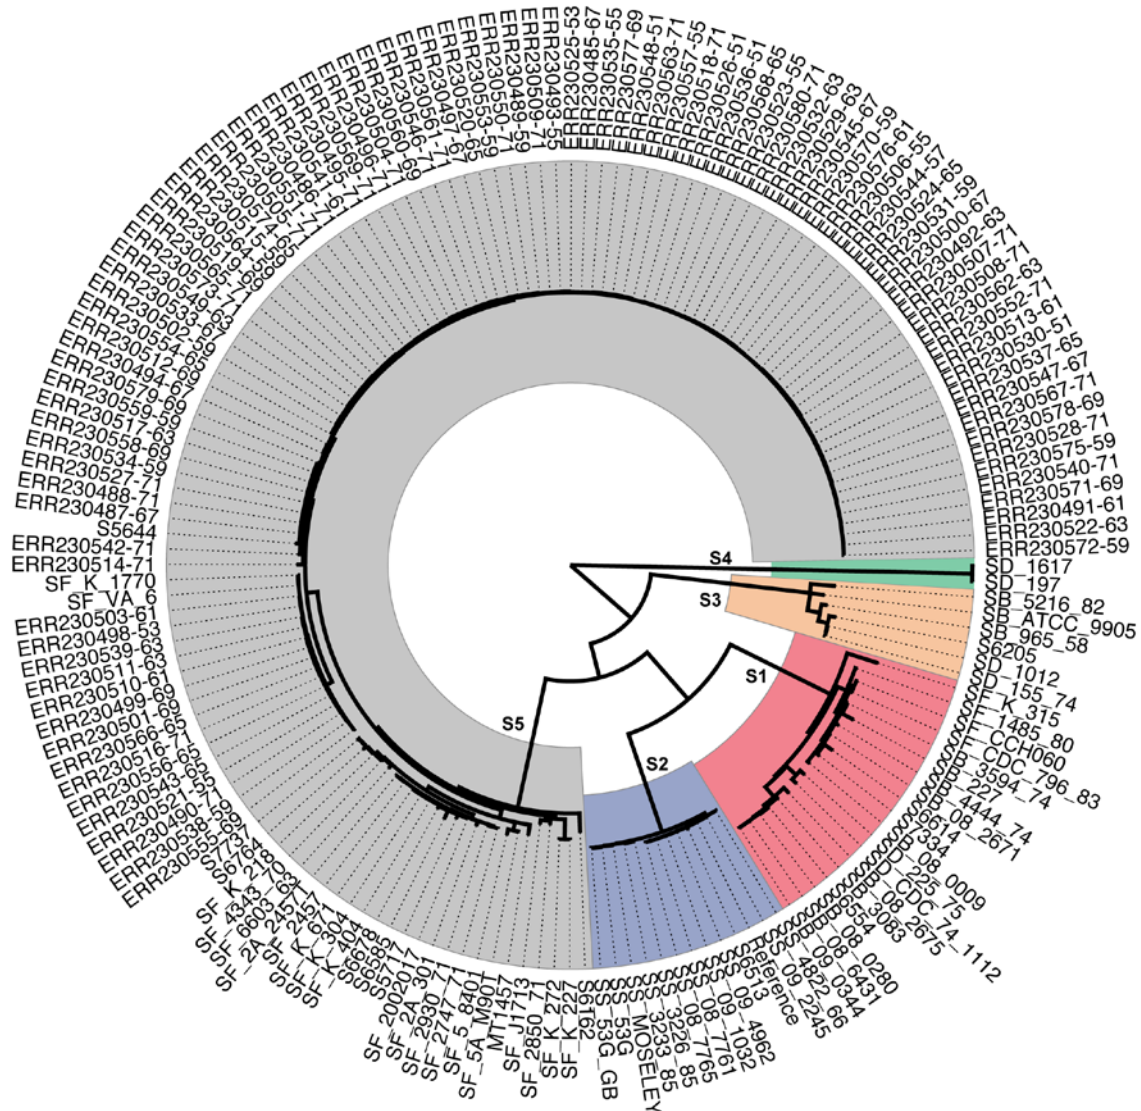

1 Supplemental References

2

3 1. **Angiuoli, S. V., and S. L. Salzberg.** 2010. Mugsy: Fast multiple alignment of  
4 closely related whole genomes. *Bioinformatics*.

5 2. **Price, M. N., P. S. Dehal, and A. P. Arkin.** 2010. FastTree 2--approximately  
6 maximum-likelihood trees for large alignments. *PLoS One* **5**:e9490.

7
